# Supplementary material for: Controlled ring-opening (co)polymerization of macrolactones: a pursuit for efficient aluminum-based catalysts
Source: Royal Society of Chemistry journal article supplement (doi:10.1039/d4py00003j), 2024-01-01
Supplement: d4py00003j1.pdf [file d4py00003j1.pdf]

## Electronic Supplementary Information

for

### Controlled Ring-Opening (Co)Polymerization of Macrolactones: A Pursuit for Efficient Aluminum-Based Catalysts

*Chutikan Nakornkhet,<sup>a,b</sup> Sirawan Kamavichanurat,<sup>a,b</sup> Wasan Joopor<sup>a,b</sup>  
and Pimpa Hormnirun<sup>a,b\*</sup>*

<sup>a</sup>Laboratory of Catalysts and Advanced Polymer Materials, Department of Chemistry and Center of Excellence for Innovation in Chemistry, Faculty of Science, Kasetsart University, Bangkok 10900, Thailand

<sup>b</sup>Center for Advanced Studies in Nanotechnology for Chemical, Food and Agricultural Industries, Kasetsart University.

\*E-mail: fscipph@ku.ac.th

## Content

|                 | page                                                                                                                                                                                                                                             |
|-----------------|--------------------------------------------------------------------------------------------------------------------------------------------------------------------------------------------------------------------------------------------------|
| <b>Fig. S1</b>  | $^1\text{H}$ and $^{13}\text{C}\{^1\text{H}\}$ NMR spectra of <b>1</b> in $\text{CDCl}_3$ at 298 K. S5                                                                                                                                           |
| <b>Fig. S2</b>  | $^1\text{H}$ NMR spectrum of <b>2</b> in $\text{CDCl}_3$ at 298 K. S6                                                                                                                                                                            |
| <b>Fig. S3</b>  | $^1\text{H}$ NMR spectrum of <b>3</b> in $\text{CDCl}_3$ at 298 K. S6                                                                                                                                                                            |
| <b>Fig. S4</b>  | $^1\text{H}$ NMR spectrum of <b>4</b> in $\text{CDCl}_3$ at 298 K. S7                                                                                                                                                                            |
| <b>Fig. S5</b>  | $^1\text{H}$ and $^{13}\text{C}\{^1\text{H}\}$ NMR spectra of <b>5</b> in $\text{THF-}d_8$ at 298 K. S8                                                                                                                                          |
| <b>Fig. S6</b>  | $^1\text{H}$ and $^{13}\text{C}\{^1\text{H}\}$ NMR spectra of <b>6</b> in $\text{CDCl}_3$ at 298 K. S9                                                                                                                                           |
| <b>Fig. S7</b>  | $^1\text{H}$ and $^{13}\text{C}\{^1\text{H}\}$ NMR spectra of <b>7</b> in $\text{CDCl}_3$ at 298 K. S10                                                                                                                                          |
| <b>Fig. S8</b>  | $^1\text{H}$ NMR spectrum of <b>8</b> in $\text{CDCl}_3$ at 298 K. S11                                                                                                                                                                           |
| <b>Fig. S9</b>  | $^1\text{H}$ NMR spectrum of <b>9</b> in $\text{CDCl}_3$ at 298 K. S11                                                                                                                                                                           |
| <b>Fig. S10</b> | $^1\text{H}$ and $^{13}\text{C}\{^1\text{H}\}$ NMR spectra of <b>10</b> in $\text{CDCl}_3$ at 298 K. S12                                                                                                                                         |
| <b>Fig. S11</b> | GPC trace of PPDL using complex <b>9</b> (Table 1, entry 9) S13                                                                                                                                                                                  |
| <b>Fig. S12</b> | Semilogarithmic plot of PDL conversion versus time in $\text{C}_6\text{D}_6$ at 70 °C with complex <b>1</b> S13<br>( $[\text{PDL}]_0/[\text{Al}] = 100$ , $[\text{Al}]/[\text{BnOH}] = 1$ , $[\text{PDL}]_0 = 1.25$ , $[\text{Al}] = 12.5$ mM).  |
| <b>Fig. S13</b> | Semilogarithmic plot of PDL conversion versus time in $\text{C}_6\text{D}_6$ at 70 °C with complex <b>2</b> S13<br>( $[\text{PDL}]_0/[\text{Al}] = 100$ , $[\text{Al}]/[\text{BnOH}] = 1$ , $[\text{PDL}]_0 = 1.25$ , $[\text{Al}] = 12.5$ mM).  |
| <b>Fig. S14</b> | Semilogarithmic plot of PDL conversion versus time in $\text{C}_6\text{D}_6$ at 70 °C with complex <b>3</b> S14<br>( $[\text{PDL}]_0/[\text{Al}] = 100$ , $[\text{Al}]/[\text{BnOH}] = 1$ , $[\text{PDL}]_0 = 1.25$ , $[\text{Al}] = 12.5$ mM).  |
| <b>Fig. S15</b> | Semilogarithmic plot of PDL conversion versus time in $\text{C}_6\text{D}_6$ at 70 °C with complex <b>4</b> S14<br>( $[\text{PDL}]_0/[\text{Al}] = 100$ , $[\text{Al}]/[\text{BnOH}] = 1$ , $[\text{PDL}]_0 = 1.25$ , $[\text{Al}] = 12.5$ mM).  |
| <b>Fig. S16</b> | Semilogarithmic plot of PDL conversion versus time in $\text{C}_6\text{D}_6$ at 70 °C with complex <b>5</b> S14<br>( $[\text{PDL}]_0/[\text{Al}] = 100$ , $[\text{Al}]/[\text{BnOH}] = 1$ , $[\text{PDL}]_0 = 1.25$ , $[\text{Al}] = 12.5$ mM).  |
| <b>Fig. S17</b> | Semilogarithmic plot of PDL conversion versus time in $\text{C}_6\text{D}_6$ at 70 °C with complex <b>6</b> S15<br>( $[\text{PDL}]_0/[\text{Al}] = 100$ , $[\text{Al}]/[\text{BnOH}] = 1$ , $[\text{PDL}]_0 = 1.25$ , $[\text{Al}] = 12.5$ mM)   |
| <b>Fig. S18</b> | Semilogarithmic plot of PDL conversion versus time in $\text{C}_6\text{D}_6$ at 70 °C with complex <b>7</b> S15<br>( $[\text{PDL}]_0/[\text{Al}] = 100$ , $[\text{Al}]/[\text{BnOH}] = 1$ , $[\text{PDL}]_0 = 1.25$ , $[\text{Al}] = 12.5$ mM).  |
| <b>Fig. S19</b> | Semilogarithmic plot of PDL conversion versus time in $\text{C}_6\text{D}_6$ at 70 °C with complex <b>8</b> S15<br>( $[\text{PDL}]_0/[\text{Al}] = 100$ , $[\text{Al}]/[\text{BnOH}] = 1$ , $[\text{PDL}]_0 = 1.25$ , $[\text{Al}] = 12.5$ mM).  |
| <b>Fig. S20</b> | Semilogarithmic plot of PDL conversion versus time in $\text{C}_6\text{D}_6$ at 70 °C with complex <b>9</b> S16<br>( $[\text{PDL}]_0/[\text{Al}] = 100$ , $[\text{Al}]/[\text{BnOH}] = 1$ , $[\text{PDL}]_0 = 1.25$ , $[\text{Al}] = 12.5$ mM).  |
| <b>Fig. S21</b> | Semilogarithmic plot of PDL conversion versus time in $\text{C}_6\text{D}_6$ at 70 °C with complex <b>10</b> S16<br>( $[\text{PDL}]_0/[\text{Al}] = 100$ , $[\text{Al}]/[\text{BnOH}] = 1$ , $[\text{PDL}]_0 = 1.25$ , $[\text{Al}] = 12.5$ mM). |
| <b>Fig. S22</b> | Semilogarithmic plot of HDL conversion versus time in $\text{C}_6\text{D}_6$ at 70 °C with complex <b>1</b> S16<br>( $[\text{HDL}]_0/[\text{Al}] = 100$ , $[\text{Al}]/[\text{BnOH}] = 1$ , $[\text{HDL}]_0 = 1.25$ , $[\text{Al}] = 12.5$ mM).  |
| <b>Fig. S23</b> | Semilogarithmic plot of HDL conversion versus time in $\text{C}_6\text{D}_6$ at 70 °C with complex <b>2</b> S17<br>( $[\text{HDL}]_0/[\text{Al}] = 100$ , $[\text{Al}]/[\text{BnOH}] = 1$ , $[\text{HDL}]_0 = 1.25$ , $[\text{Al}] = 12.5$ mM).  |
| <b>Fig. S24</b> | Semilogarithmic plot of HDL conversion versus time in $\text{C}_6\text{D}_6$ at 70 °C with complex <b>3</b> S17<br>( $[\text{HDL}]_0/[\text{Al}] = 100$ , $[\text{Al}]/[\text{BnOH}] = 1$ , $[\text{HDL}]_0 = 1.25$ , $[\text{Al}] = 12.5$ mM).  |
| <b>Fig. S25</b> | Semilogarithmic plot of HDL conversion versus time in $\text{C}_6\text{D}_6$ at 70 °C with complex <b>4</b> S17<br>( $[\text{HDL}]_0/[\text{Al}] = 100$ , $[\text{Al}]/[\text{BnOH}] = 1$ , $[\text{HDL}]_0 = 1.25$ , $[\text{Al}] = 12.5$ mM).  |

|                 |                                                                                                                                                                                                                                                 |     |
|-----------------|-------------------------------------------------------------------------------------------------------------------------------------------------------------------------------------------------------------------------------------------------|-----|
| <b>Fig. S26</b> | Semilogarithmic plot of HDL conversion versus time in C <sub>6</sub> D <sub>6</sub> at 70 °C with complex <b>5</b> ([HDL] <sub>0</sub> /[Al] = 100, [Al]/[BnOH] = 1, [HDL] <sub>0</sub> = 1.25, [Al] = 12.5 mM).                                | S18 |
| <b>Fig. S27</b> | Semilogarithmic plot of HDL conversion versus time in C <sub>6</sub> D <sub>6</sub> at 70 °C with complex <b>6</b> ([HDL] <sub>0</sub> /[Al] = 100, [Al]/[BnOH] = 1, [HDL] <sub>0</sub> = 1.25, [Al] = 12.5 mM).                                | S18 |
| <b>Fig. S28</b> | Semilogarithmic plot of HDL conversion versus time in C <sub>6</sub> D <sub>6</sub> at 70 °C with complex <b>7</b> ([HDL] <sub>0</sub> /[Al] = 100, [Al]/[BnOH] = 1, [HDL] <sub>0</sub> = 1.25, [Al] = 12.5 mM).                                | S18 |
| <b>Fig. S29</b> | Semilogarithmic plot of HDL conversion versus time in C <sub>6</sub> D <sub>6</sub> at 70 °C with complex <b>8</b> ([HDL] <sub>0</sub> /[Al] = 100, [Al]/[BnOH] = 1, [HDL] <sub>0</sub> = 1.25, [Al] = 12.5 mM).                                | S19 |
| <b>Fig. S30</b> | Semilogarithmic plot of HDL conversion versus time in C <sub>6</sub> D <sub>6</sub> at 70 °C with complex <b>9</b> ([HDL] <sub>0</sub> /[Al] = 100, [Al]/[BnOH] = 1, [HDL] <sub>0</sub> = 1.25, [Al] = 12.5 mM).                                | S19 |
| <b>Fig. S31</b> | Semilogarithmic plot of HDL conversion versus time in C <sub>6</sub> D <sub>6</sub> at 70 °C with complex <b>10</b> ([HDL] <sub>0</sub> /[Al] = 100, [Al]/[BnOH] = 1, [HDL] <sub>0</sub> = 1.25, [Al] = 12.5 mM).                               | S19 |
| <b>Fig. S32</b> | Semilogarithmic plot of 6HDL conversion versus time in C <sub>6</sub> D <sub>6</sub> at 70 °C with complex <b>1</b> ([6HDL] <sub>0</sub> /[Al] = 100, [Al]/[BnOH] = 1, [6HDL] <sub>0</sub> = 1.25, [Al] = 12.5 mM).                             | S20 |
| <b>Fig. S33</b> | Semilogarithmic plot of 6HDL conversion versus time in C <sub>6</sub> D <sub>6</sub> at 70 °C with complex <b>2</b> ([6HDL] <sub>0</sub> /[Al] = 100, [Al]/[BnOH] = 1, [6HDL] <sub>0</sub> = 1.25, [Al] = 12.5 mM).                             | S20 |
| <b>Fig. S34</b> | Semilogarithmic plot of 6HDL conversion versus time in C <sub>6</sub> D <sub>6</sub> at 70 °C with complex <b>3</b> ([6HDL] <sub>0</sub> /[Al] = 100, [Al]/[BnOH] = 1, [6HDL] <sub>0</sub> = 1.25, [Al] = 12.5 mM).                             | S20 |
| <b>Fig. S35</b> | Semilogarithmic plot of 6HDL conversion versus time in C <sub>6</sub> D <sub>6</sub> at 70 °C with complex <b>4</b> ([6HDL] <sub>0</sub> /[Al] = 100, [Al]/[BnOH] = 1, [6HDL] <sub>0</sub> = 1.25, [Al] = 12.5 mM).                             | S21 |
| <b>Fig. S36</b> | Semilogarithmic plot of 6HDL conversion versus time in C <sub>6</sub> D <sub>6</sub> at 70 °C with complex <b>5</b> ([6HDL] <sub>0</sub> /[Al] = 100, [Al]/[BnOH] = 1, [6HDL] <sub>0</sub> = 1.25, [Al] = 12.5 mM).                             | S21 |
| <b>Fig. S37</b> | Semilogarithmic plot of 6HDL conversion versus time in C <sub>6</sub> D <sub>6</sub> at 70 °C with complex <b>6</b> ([6HDL] <sub>0</sub> /[Al] = 100, [Al]/[BnOH] = 1, [6HDL] <sub>0</sub> = 1.25, [Al] = 12.5 mM).                             | S21 |
| <b>Fig. S38</b> | Semilogarithmic plot of 6HDL conversion versus time in C <sub>6</sub> D <sub>6</sub> at 70 °C with complex <b>7</b> ([6HDL] <sub>0</sub> /[Al] = 100, [Al]/[BnOH] = 1, [6HDL] <sub>0</sub> = 1.25, [Al] = 12.5 mM).                             | S22 |
| <b>Fig. S39</b> | Semilogarithmic plot of 6HDL conversion versus time in C <sub>6</sub> D <sub>6</sub> at 70 °C with complex <b>8</b> ([6HDL] <sub>0</sub> /[Al] = 100, [Al]/[BnOH] = 1, [6HDL] <sub>0</sub> = 1.25, [Al] = 12.5 mM).                             | S22 |
| <b>Fig. S40</b> | Semilogarithmic plot of 6HDL conversion versus time in C <sub>6</sub> D <sub>6</sub> at 70 °C with complex <b>9</b> ([6HDL] <sub>0</sub> /[Al] = 100, [Al]/[BnOH] = 1, [6HDL] <sub>0</sub> = 1.25, [Al] = 12.5 mM).                             | S22 |
| <b>Fig. S41</b> | Semilogarithmic plot of 6HDL conversion versus time in C <sub>6</sub> D <sub>6</sub> at 70 °C with complex <b>10</b> ([6HDL] <sub>0</sub> /[Al] = 100, [Al]/[BnOH] = 1, [6HDL] <sub>0</sub> = 1.25, [Al] = 12.5 mM).                            | S23 |
| <b>Fig. S42</b> | Plot of the HDL $M_n$ (●) ( <i>versus</i> polystyrene standards) and $\bar{D}$ (○) as a function of monomer conversion for HDL using <b>9</b> /BnOH as an initiator ([HDL] <sub>0</sub> /[Al] = 100, benzene- <i>d</i> <sub>6</sub> , 70 °C).   | S23 |
| <b>Fig. S43</b> | Plot of the 6HDL $M_n$ (●) ( <i>versus</i> polystyrene standards) and $\bar{D}$ (○) as a function of monomer conversion for 6HDL using <b>9</b> /BnOH as an initiator ([HDL] <sub>0</sub> /[Al] = 100, benzene- <i>d</i> <sub>6</sub> , 70 °C). | S23 |
| <b>Fig. S44</b> | GPC curve of Poly(PDL- <i>b</i> -L-LA) using complex <b>9</b> (Table 6, entry 1)                                                                                                                                                                | S24 |
| <b>Fig. S45</b> | GPC curve of Poly(L-LA- <i>co</i> -PDL) using complex <b>9</b> (Table 6, entry 2)                                                                                                                                                               | S24 |
| <b>Fig. S46</b> | GPC curve of Poly(L-LA- <i>co</i> -PDL) using complex <b>9</b> (Table 6, entry 3)                                                                                                                                                               | S24 |

|                 |                                                                                                                                                                                                                               |     |
|-----------------|-------------------------------------------------------------------------------------------------------------------------------------------------------------------------------------------------------------------------------|-----|
| <b>Fig. S47</b> | $^1\text{H}$ and $^{13}\text{C}\{^1\text{H}\}$ NMR spectra of polypentadecalactone (PPDL) in $\text{CDCl}_3$ at 298 K.                                                                                                        | S25 |
| <b>Fig. S48</b> | $^1\text{H}$ and $^{13}\text{C}\{^1\text{H}\}$ NMR spectra of polyhexadecalactone (PHDL) in $\text{CDCl}_3$ at 298 K.                                                                                                         | S26 |
| <b>Fig. S49</b> | $^1\text{H}$ and $^{13}\text{C}\{^1\text{H}\}$ NMR spectra of poly( $\omega$ -6-hexadecenlactone, 6HDL) in $\text{CDCl}_3$ at 298 K.                                                                                          | S27 |
| <b>Fig. S50</b> | $^1\text{H}$ NMR spectrum of poly(PDL- <i>co</i> -CL) in $\text{C}_6\text{D}_6$ at 298 K (Table 4, entry 1).                                                                                                                  | S28 |
| <b>Fig. S51</b> | $^1\text{H}$ NMR spectrum of poly(HDL- <i>co</i> -CL) in $\text{C}_6\text{D}_6$ at 298 K (Table 4, entry 2).                                                                                                                  | S28 |
| <b>Fig. S52</b> | $^1\text{H}$ NMR spectrum of poly(6HDL- <i>co</i> -CL) in $\text{C}_6\text{D}_6$ at 298 K (Table 4, entry 3).                                                                                                                 | S29 |
| <b>Fig. S53</b> | $^1\text{H}$ and $^{13}\text{C}\{^1\text{H}\}$ NMR spectra of poly(PDL- <i>co</i> -CL) in $\text{CDCl}_3$ at 298 K (Table 4, entry 1).                                                                                        | S30 |
| <b>Fig. S54</b> | $^1\text{H}$ and $^{13}\text{C}\{^1\text{H}\}$ NMR spectra of poly(HDL- <i>co</i> -CL) in $\text{CDCl}_3$ at 298 K (Table 4, entry 2).                                                                                        | S31 |
| <b>Fig. S55</b> | $^1\text{H}$ and $^{13}\text{C}\{^1\text{H}\}$ NMR spectra of poly(6HDL- <i>b</i> -CL) in $\text{CDCl}_3$ at 298 K (Table 4, entry 3).                                                                                        | S32 |
| <b>Fig. S56</b> | $^1\text{H}$ NMR spectra of poly(PDL- <i>b</i> -CL) in $\text{C}_6\text{D}_6$ at 298 K.                                                                                                                                       | S33 |
| <b>Fig. S57</b> | $^1\text{H}$ and $^{13}\text{C}\{^1\text{H}\}$ NMR spectra of poly(PDL- <i>b</i> -CL) in $\text{CDCl}_3$ at 298 K (Table 4, entry 4).                                                                                         | S34 |
| <b>Fig. S58</b> | $^1\text{H}$ and $^{13}\text{C}\{^1\text{H}\}$ NMR spectra of poly(PDL- <i>co</i> -CL) in $\text{CDCl}_3$ at 298 K (Table 4, entry 5).                                                                                        | S35 |
| <b>Fig. S59</b> | $^1\text{H}$ and $^{13}\text{C}\{^1\text{H}\}$ NMR spectra of poly(HDL- <i>b</i> -CL) in $\text{CDCl}_3$ at 298 K (Table 4, entry 6).                                                                                         | S36 |
| <b>Fig. S60</b> | $^1\text{H}$ and $^{13}\text{C}\{^1\text{H}\}$ NMR spectra of poly(HDL- <i>co</i> -CL) in $\text{CDCl}_3$ at 298 K (Table 4, entry 7).                                                                                        | S37 |
| <b>Fig. S61</b> | $^1\text{H}$ NMR spectrum of poly(6HDL- <i>b</i> -CL) in $\text{C}_6\text{D}_6$ at 298 K (Table 4, entry 8).                                                                                                                  | S38 |
| <b>Fig. S62</b> | $^1\text{H}$ and $^{13}\text{C}\{^1\text{H}\}$ NMR spectra of poly(6HDL- <i>b</i> -CL) in $\text{CDCl}_3$ at 298 K (Table 4, entry 8).                                                                                        | S39 |
| <b>Fig. S63</b> | $^1\text{H}$ and $^{13}\text{C}\{^1\text{H}\}$ NMR spectra of poly(6HDL- <i>co</i> -CL) in $\text{CDCl}_3$ at 298 K (Table 4, entry 9).                                                                                       | S40 |
| <b>Fig. S64</b> | The DOSY NMR spectrum of a poly(PDL- <i>co</i> -L-LA) in $\text{CDCl}_3$ (Table 6, entry 2).                                                                                                                                  | S41 |
| <b>Fig. S65</b> | $^1\text{H}$ NMR spectrum of poly(L-LA- <i>co</i> -PDL) (Table 6, entry 3).                                                                                                                                                   | S41 |
| <b>Fig. S66</b> | The DOSY NMR spectrum of a poly(L-LA- <i>co</i> -PDL) in $\text{CDCl}_3$ (Table 6, entry 3).                                                                                                                                  | S42 |
| <b>Fig. S67</b> | $^1\text{H}$ and $^{13}\text{C}\{^1\text{H}\}$ NMR spectra of poly(L-LA- <i>b</i> -PDL) in $\text{CDCl}_3$ at 298 K (Table 6, entry 1).                                                                                       | S43 |
| <b>Fig. S68</b> | $^{13}\text{C}\{^1\text{H}\}$ NMR spectra at the methylene region of poly(PDL- <i>b</i> -CL) in $\text{CDCl}_3$ at 298 K (Table 7, entry 1).                                                                                  | S44 |
| <b>Fig. S69</b> | $^{13}\text{C}\{^1\text{H}\}$ NMR spectra at the methylene region of poly(PDL- <i>b</i> -CL) ( <b>a</b> , 30 + 5 min) and ( <b>b</b> , 30 + 360 min) poly(PDL- <i>co</i> -CL) in $\text{CDCl}_3$ at 298 K (Table 7, entry 2). | S44 |
| <b>Fig. S70</b> | $^{13}\text{C}\{^1\text{H}\}$ NMR spectra at the methylene region of poly(PDL- <i>b</i> -CL) in $\text{CDCl}_3$ at 298 K (Table 7, entry 3).                                                                                  | S44 |
| <b>Table S1</b> | Kinetic results for the ROP of MLs and L-LA using aluminum complexes <b>1–10</b> in the presence of benzyl alcohol. <sup>a</sup>                                                                                              | S46 |

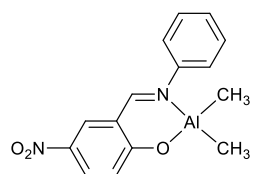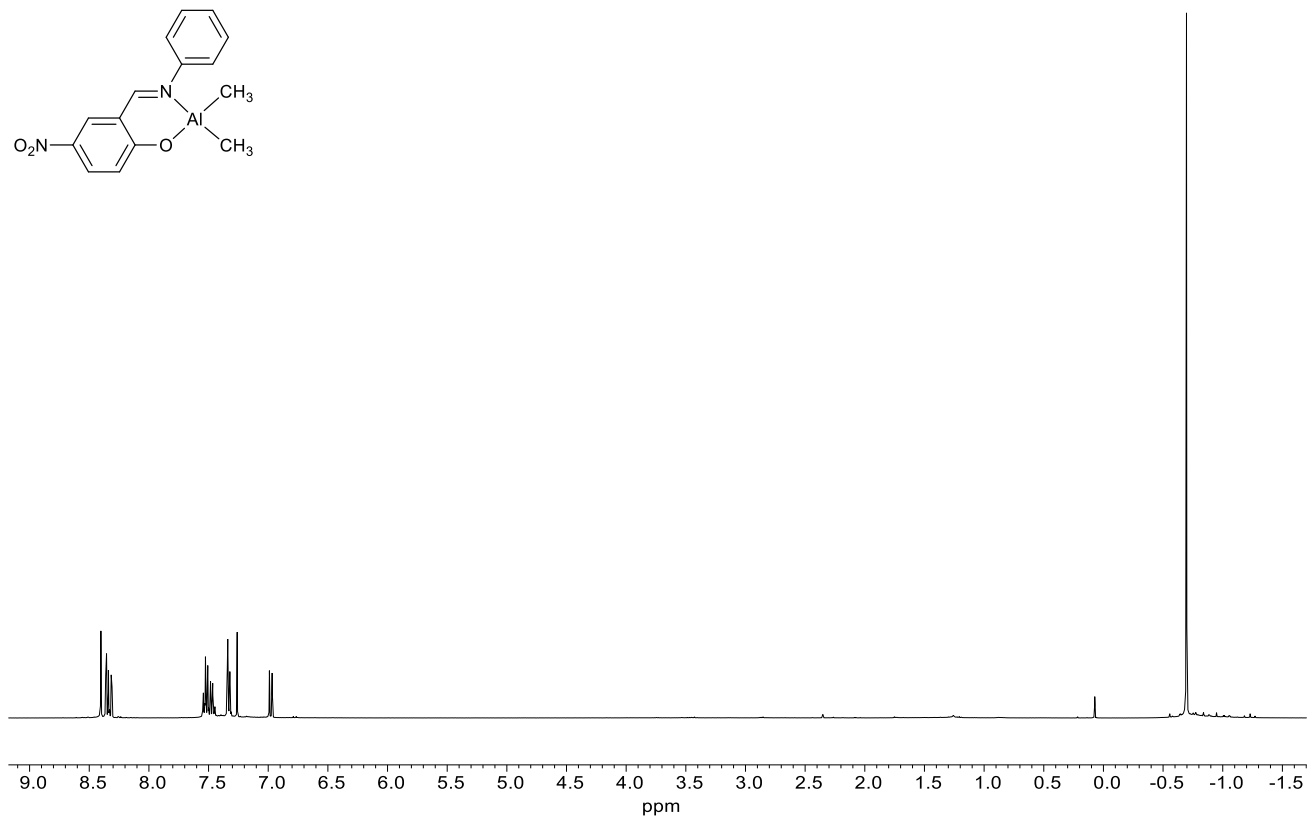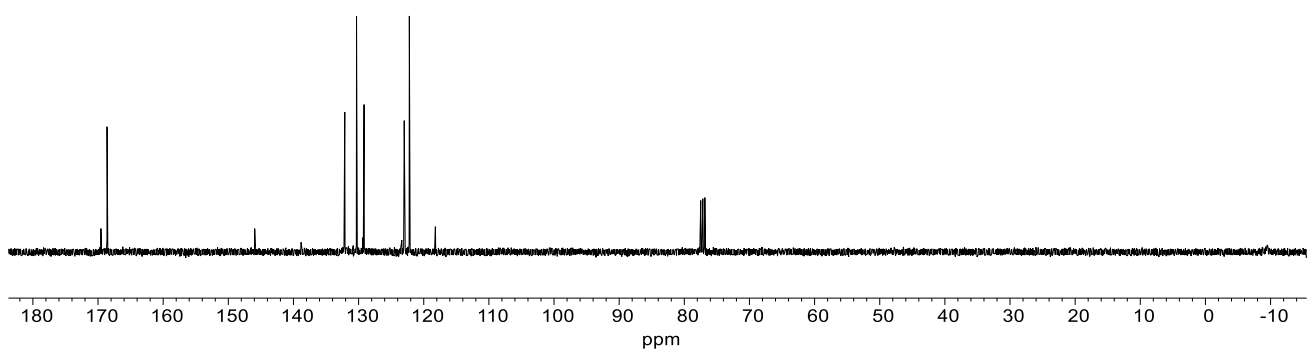

**Fig. S1**  $^1\text{H}$  and  $^{13}\text{C}\{^1\text{H}\}$  NMR spectra of **1** in  $\text{CDCl}_3$  at 298 K.

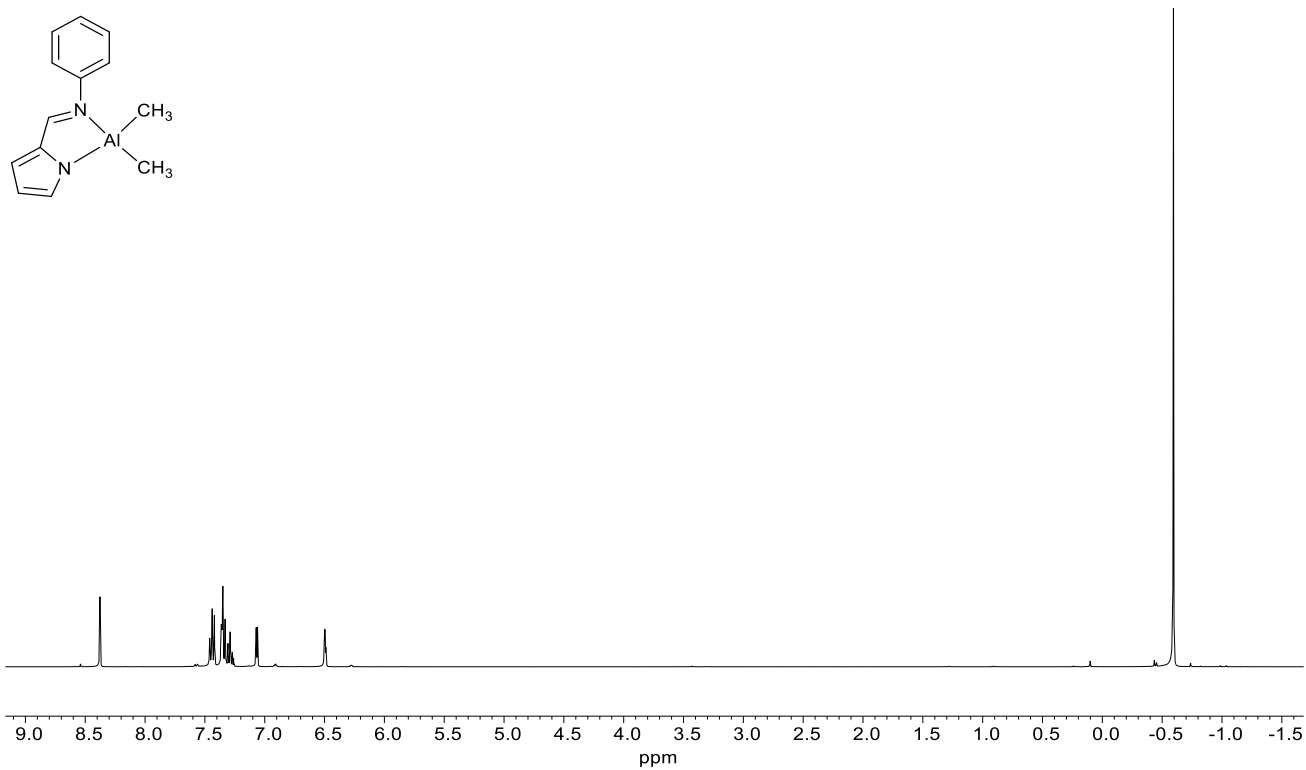

**Fig. S2** <sup>1</sup>H NMR spectrum of **2** in CDCl<sub>3</sub> at 298 K.

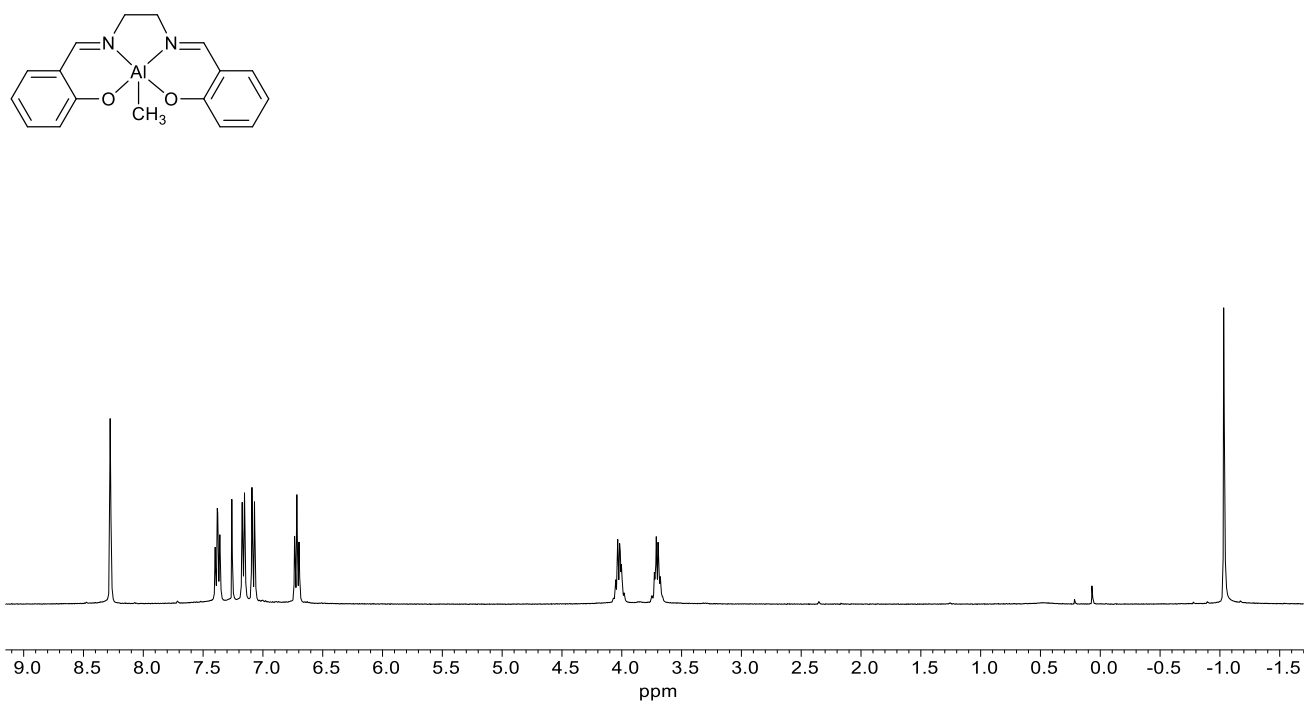

**Fig. S3** <sup>1</sup>H NMR spectrum of **3** in CDCl<sub>3</sub> at 298 K.

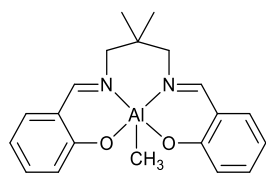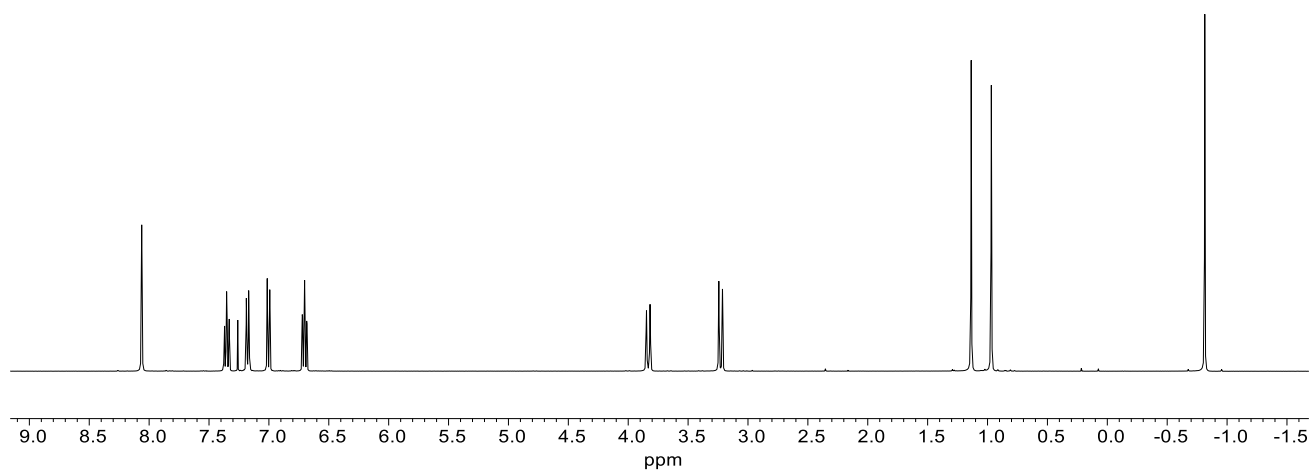

**Fig. S4** <sup>1</sup>H NMR spectrum of **4** in CDCl<sub>3</sub> at 298 K.

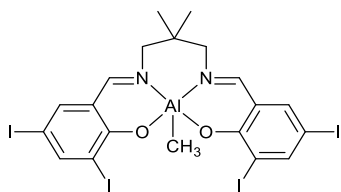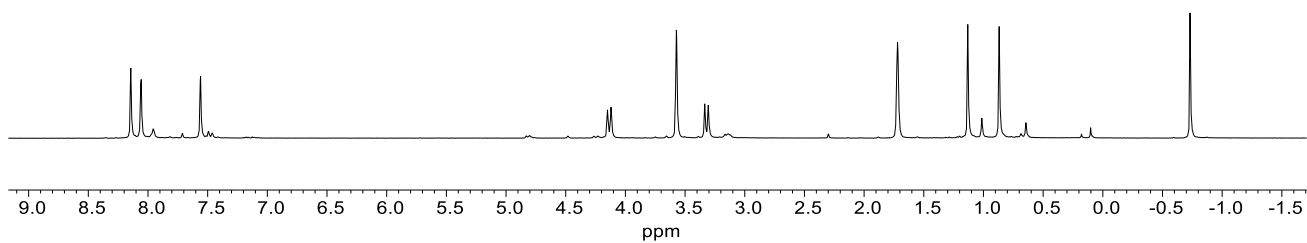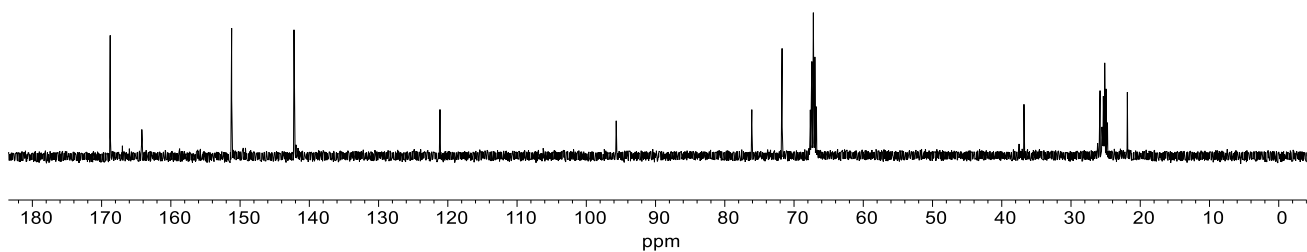

**Fig. S5**  $^1\text{H}$  and  $^{13}\text{C}\{^1\text{H}\}$  NMR spectra of **5** in  $\text{THF-}d_8$  at 298 K.



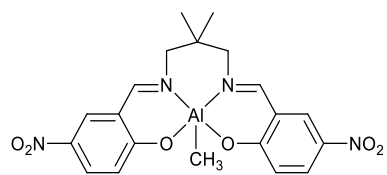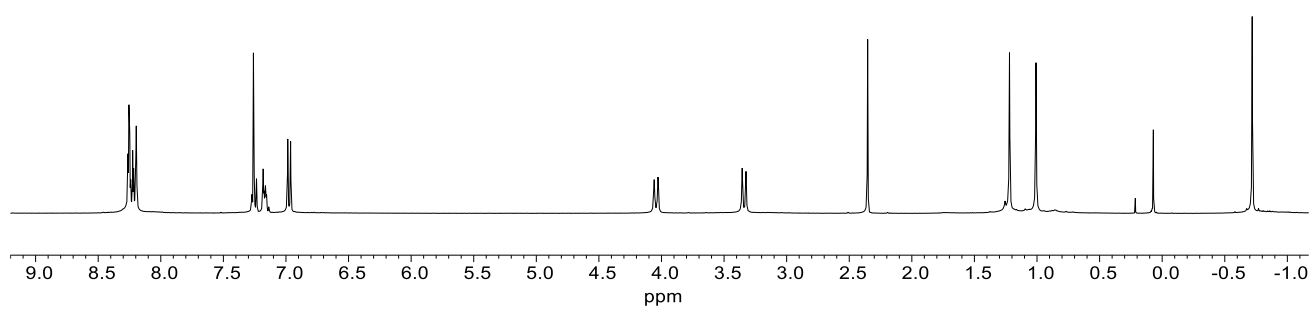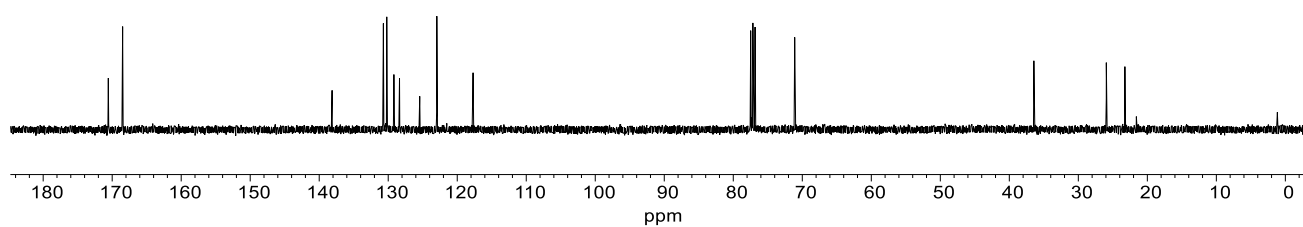

**Fig. S6** <sup>1</sup>H and <sup>13</sup>C{<sup>1</sup>H} NMR spectra of **6** in CDCl<sub>3</sub> at 298 K.

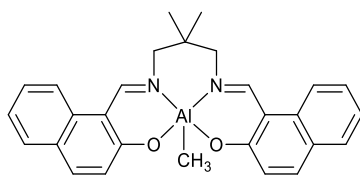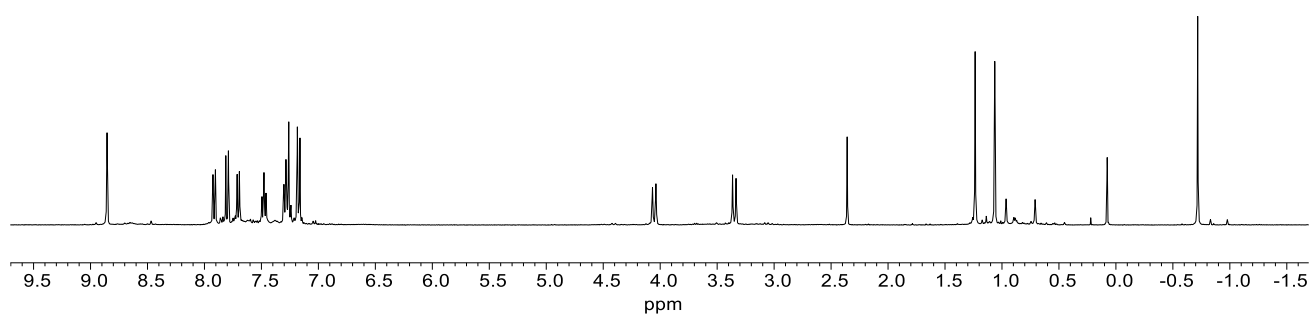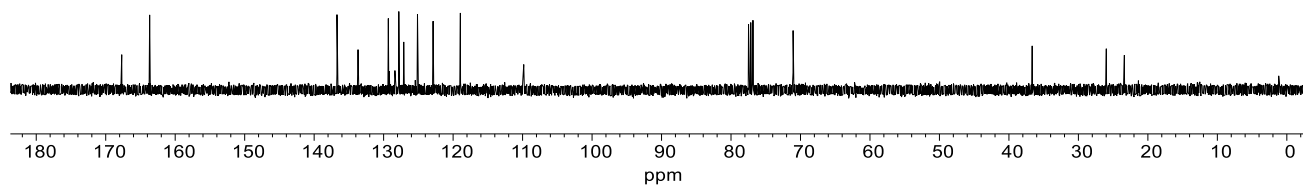

**Fig. S7** <sup>1</sup>H and <sup>13</sup>C{<sup>1</sup>H} NMR spectra of **7** in CDCl<sub>3</sub> at 298 K.



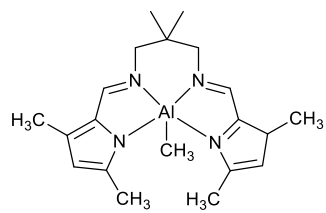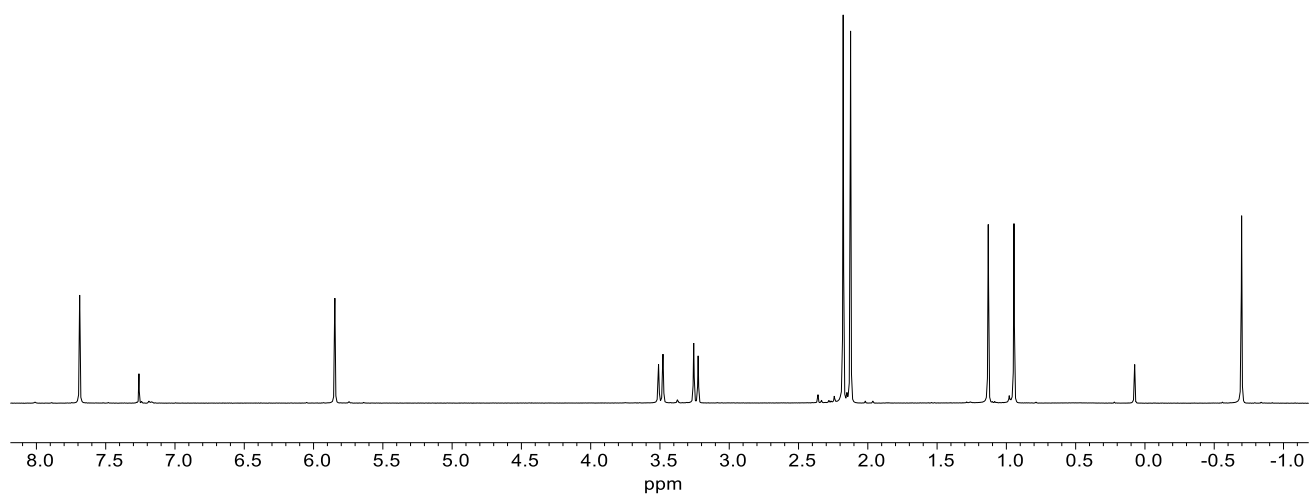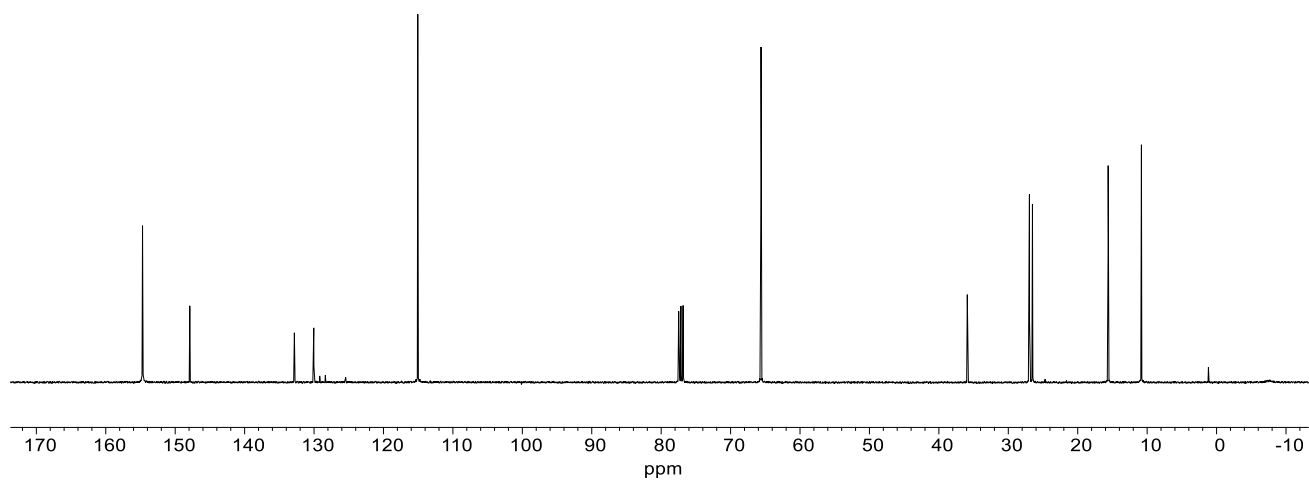

**Fig. S10** <sup>1</sup>H and <sup>13</sup>C{<sup>1</sup>H} NMR spectra of **10** in CDCl<sub>3</sub> at 298 K.

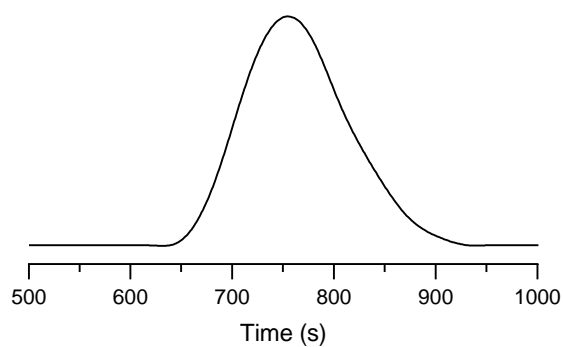

**Fig. S11** GPC trace of PPDL using complex **9** (Table 1, entry 9)

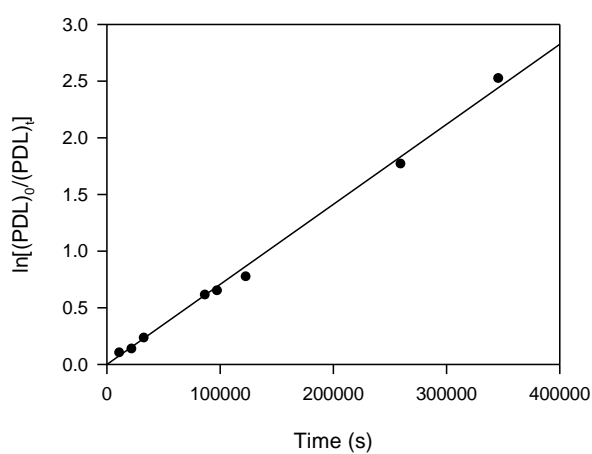

**Fig. S12** Semilogarithmic plot of PDL conversion versus time in  $C_6D_6$  at 70 °C with complex **1** ( $[PDL]_0/[Al] = 100$ ,  $[Al]/[BnOH] = 1$ ,  $[PDL]_0 = 1.25$ ,  $[Al] = 12.5$  mM).

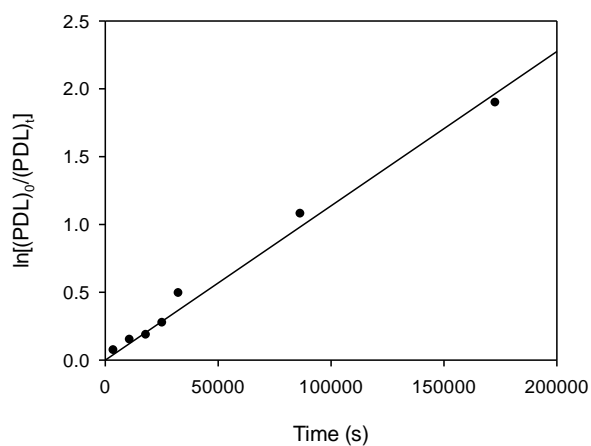

**Fig. S13** Semilogarithmic plot of PDL conversion versus time in  $C_6D_6$  at 70 °C with complex **2** ( $[PDL]_0/[Al] = 100$ ,  $[Al]/[BnOH] = 1$ ,  $[PDL]_0 = 1.25$ ,  $[Al] = 12.5$  mM).

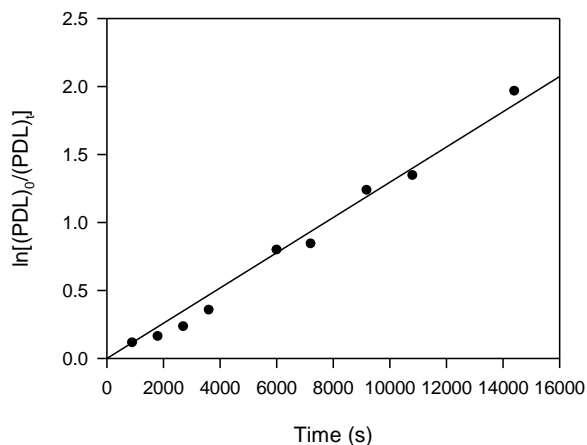

**Fig. S14** Semilogarithmic plot of PDL conversion versus time in  $C_6D_6$  at 70 °C with complex **3** ( $[PDL]_0/[Al] = 100$ ,  $[Al]/[BnOH] = 1$ ,  $[PDL]_0 = 1.25$ ,  $[Al] = 12.5$  mM).

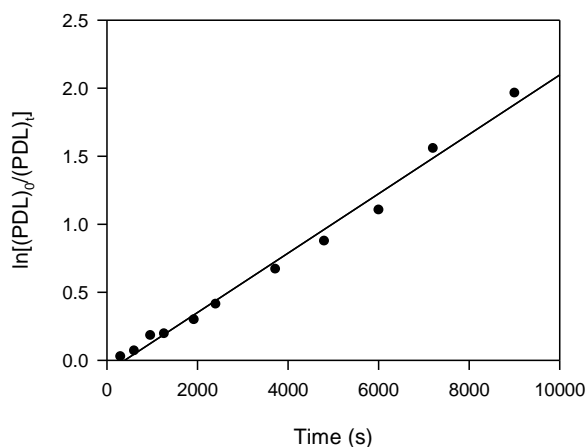

**Fig. S15** Semilogarithmic plot of PDL conversion versus time in  $C_6D_6$  at 70 °C with complex **4** ( $[PDL]_0/[Al] = 100$ ,  $[Al]/[BnOH] = 1$ ,  $[PDL]_0 = 1.25$ ,  $[Al] = 12.5$  mM).

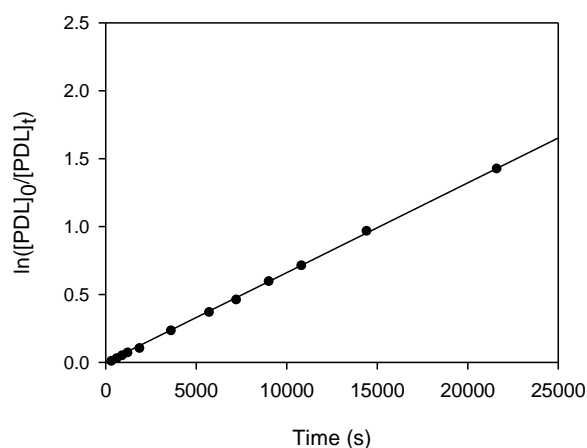

**Fig. S16** Semilogarithmic plot of PDL conversion versus time in  $C_6D_6$  at 70 °C with complex **5** ( $[PDL]_0/[Al] = 100$ ,  $[Al]/[BnOH] = 1$ ,  $[PDL]_0 = 1.25$ ,  $[Al] = 12.5$  mM).

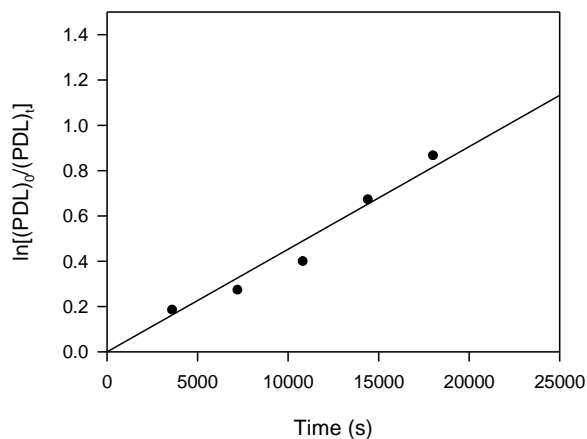

**Fig. S17** Semilogarithmic plot of PDL conversion versus time in C<sub>6</sub>D<sub>6</sub> at 70 °C with complex **6** ([PDL]<sub>0</sub>/[Al] = 100, [Al]/[BnOH] = 1, [PDL]<sub>0</sub> = 1.25, [Al] = 12.5 mM).

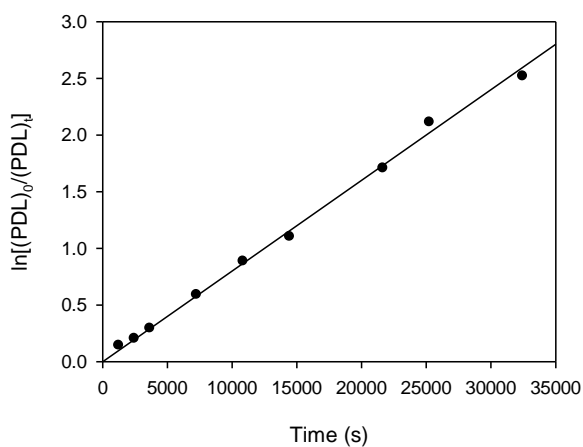

**Fig. S18** Semilogarithmic plot of PDL conversion versus time in C<sub>6</sub>D<sub>6</sub> at 70 °C with complex **7** ([PDL]<sub>0</sub>/[Al] = 100, [Al]/[BnOH] = 1, [PDL]<sub>0</sub> = 1.25, [Al] = 12.5 mM).

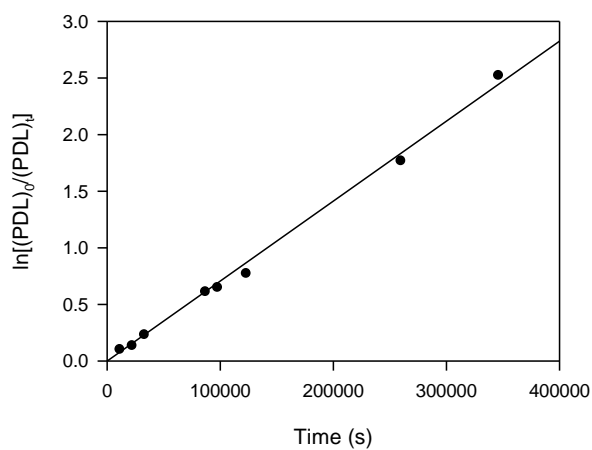

**Fig. S19** Semilogarithmic plot of PDL conversion versus time in C<sub>6</sub>D<sub>6</sub> at 70 °C with complex **8** ([PDL]<sub>0</sub>/[Al] = 100, [Al]/[BnOH] = 1, [PDL]<sub>0</sub> = 1.25, [Al] = 12.5 mM).

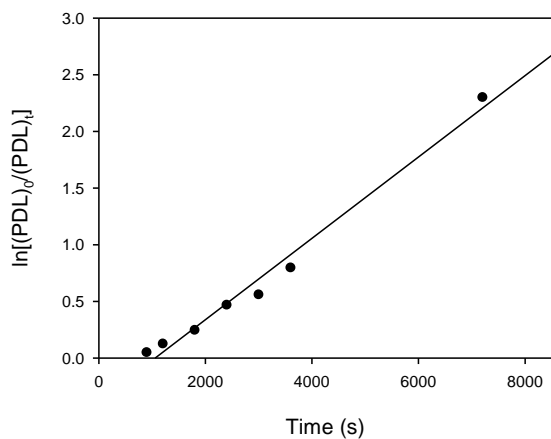

**Fig. S20** Semilogarithmic plot of PDL conversion versus time in  $C_6D_6$  at 70 °C with complex **9** ( $[PDL]_0/[Al] = 100$ ,  $[Al]/[BnOH] = 1$ ,  $[PDL]_0 = 1.25$ ,  $[Al] = 12.5$  mM).

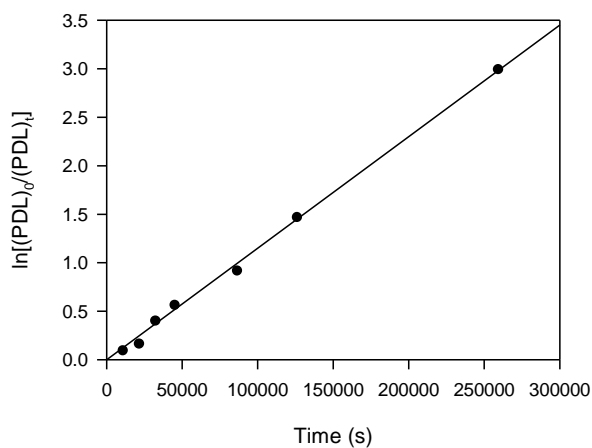

**Fig. S21** Semilogarithmic plot of PDL conversion versus time in  $C_6D_6$  at 70 °C with complex **10** ( $[PDL]_0/[Al] = 100$ ,  $[Al]/[BnOH] = 1$ ,  $[PDL]_0 = 1.25$ ,  $[Al] = 12.5$  mM).

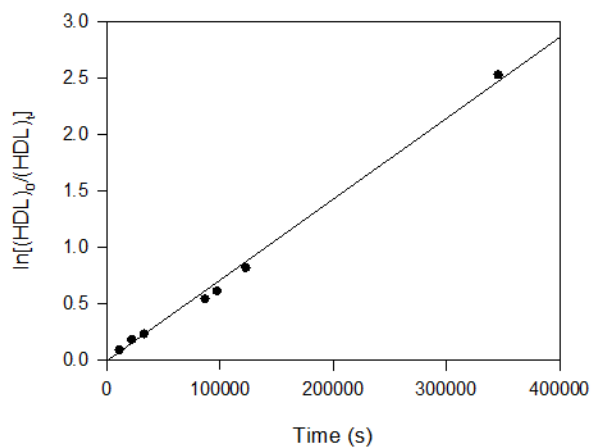

**Fig. S22** Semilogarithmic plot of HDL conversion versus time in  $C_6D_6$  at 70 °C with complex **1** ( $[HDL]_0/[Al] = 100$ ,  $[Al]/[BnOH] = 1$ ,  $[HDL]_0 = 1.25$ ,  $[Al] = 12.5$  mM).



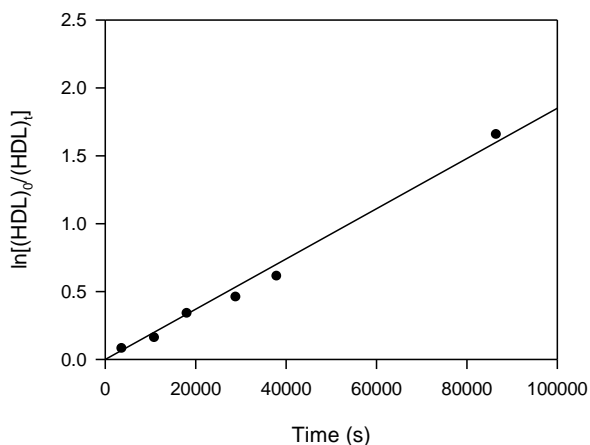

**Fig. S23** Semilogarithmic plot of HDL conversion versus time in  $C_6D_6$  at  $70\text{ }^\circ\text{C}$  with complex **2** ( $[HDL]_0/[Al] = 100$ ,  $[Al]/[BnOH] = 1$ ,  $[HDL]_0 = 1.25$ ,  $[Al] = 12.5\text{ mM}$ ).

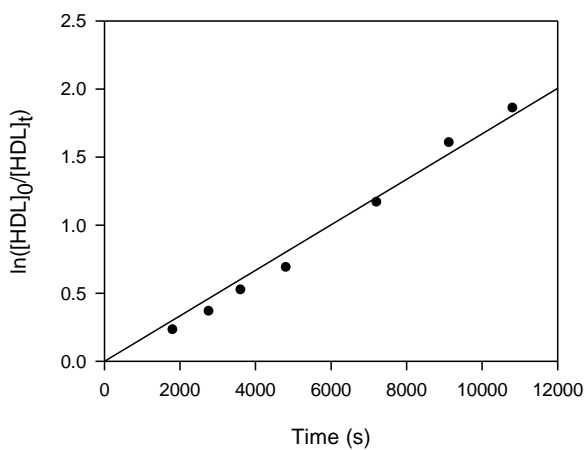

**Fig. S24** Semilogarithmic plot of HDL conversion versus time in  $C_6D_6$  at  $70\text{ }^\circ\text{C}$  with complex **3** ( $[HDL]_0/[Al] = 100$ ,  $[Al]/[BnOH] = 1$ ,  $[HDL]_0 = 1.25$ ,  $[Al] = 12.5\text{ mM}$ ).

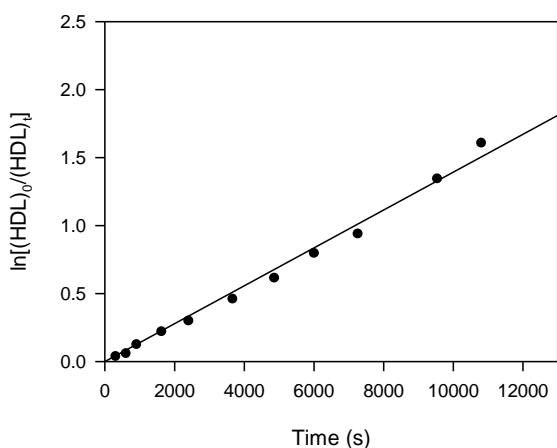

**Fig. S25** Semilogarithmic plot of HDL conversion versus time in  $C_6D_6$  at  $70\text{ }^\circ\text{C}$  with complex **4** ( $[HDL]_0/[Al] = 100$ ,  $[Al]/[BnOH] = 1$ ,  $[HDL]_0 = 1.25$ ,  $[Al] = 12.5\text{ mM}$ ).

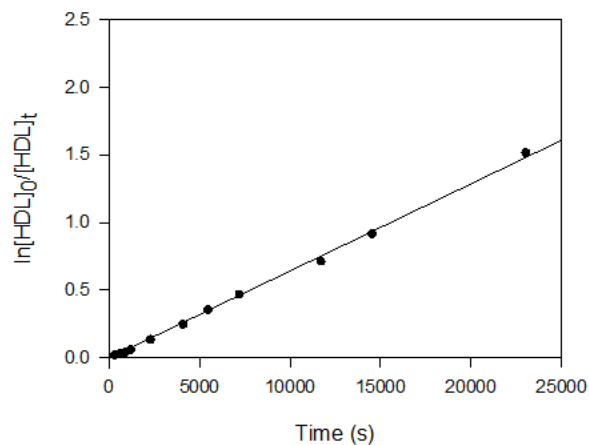

**Fig. S26** Semilogarithmic plot of HDL conversion versus time in C<sub>6</sub>D<sub>6</sub> at 70 °C with complex **5** ([HDL]<sub>0</sub>/[Al] = 100, [Al]/[BnOH] = 1, [HDL]<sub>0</sub> = 1.25, [Al] = 12.5 mM).

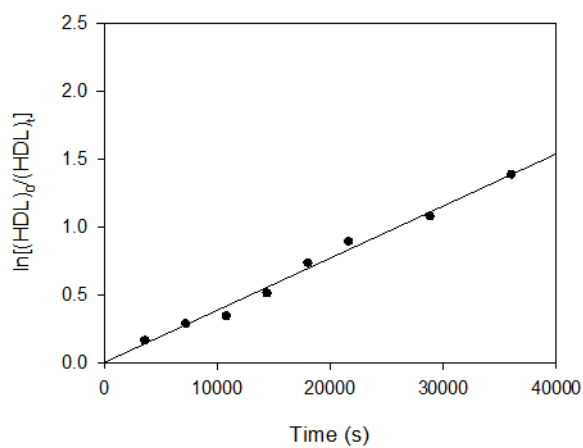

**Fig. S27** Semilogarithmic plot of HDL conversion versus time in C<sub>6</sub>D<sub>6</sub> at 70 °C with complex **6** ([HDL]<sub>0</sub>/[Al] = 100, [Al]/[BnOH] = 1, [HDL]<sub>0</sub> = 1.25, [Al] = 12.5 mM).

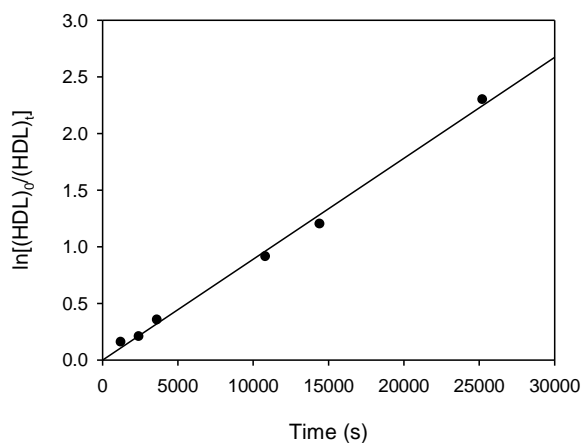

**Fig. S28** Semilogarithmic plot of HDL conversion versus time in C<sub>6</sub>D<sub>6</sub> at 70 °C with complex **7** ([HDL]<sub>0</sub>/[Al] = 100, [Al]/[BnOH] = 1, [HDL]<sub>0</sub> = 1.25, [Al] = 12.5 mM).

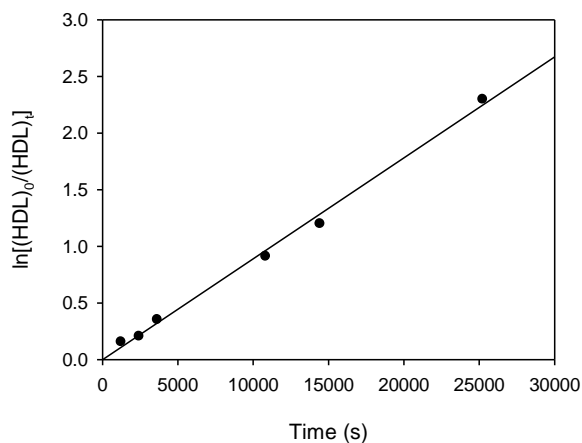

**Fig. S29** Semilogarithmic plot of HDL conversion versus time in  $\text{C}_6\text{D}_6$  at  $70^\circ\text{C}$  with complex **8** ( $[\text{HDL}]_0/[\text{Al}] = 100$ ,  $[\text{Al}]/[\text{BnOH}] = 1$ ,  $[\text{HDL}]_0 = 1.25$ ,  $[\text{Al}] = 12.5$  mM).

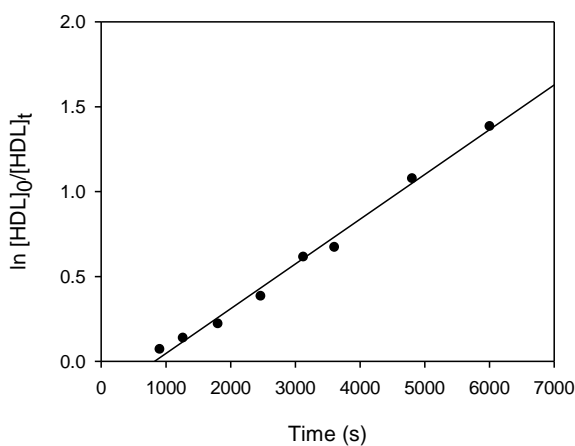

**Fig. S30** Semilogarithmic plot of HDL conversion versus time in  $\text{C}_6\text{D}_6$  at  $70^\circ\text{C}$  with complex **9** ( $[\text{HDL}]_0/[\text{Al}] = 100$ ,  $[\text{Al}]/[\text{BnOH}] = 1$ ,  $[\text{HDL}]_0 = 1.25$ ,  $[\text{Al}] = 12.5$  mM).

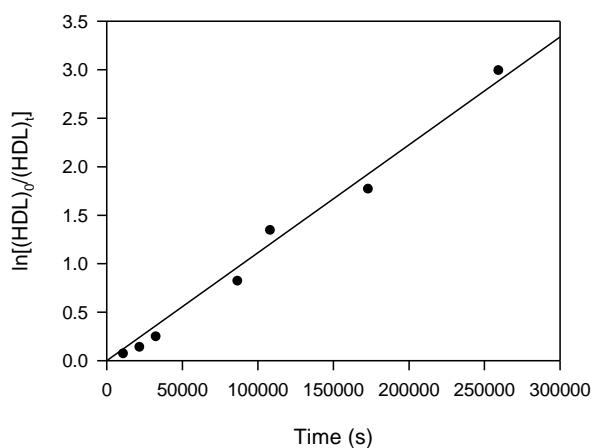

**Fig. S31** Semilogarithmic plot of HDL conversion versus time in  $\text{C}_6\text{D}_6$  at  $70^\circ\text{C}$  with complex **10** ( $[\text{HDL}]_0/[\text{Al}] = 100$ ,  $[\text{Al}]/[\text{BnOH}] = 1$ ,  $[\text{HDL}]_0 = 1.25$ ,  $[\text{Al}] = 12.5$  mM).

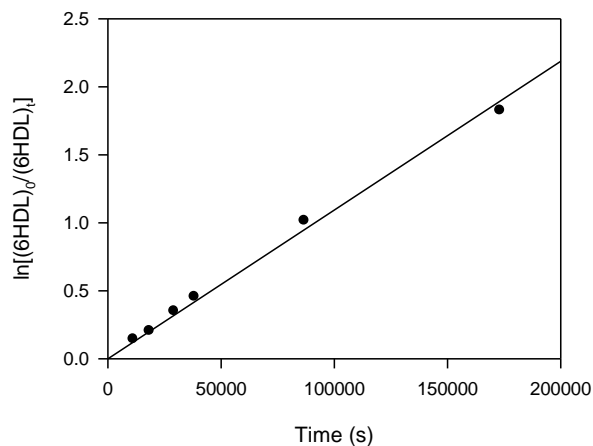

**Fig. S32** Semilogarithmic plot of 6HDL conversion versus time in  $C_6D_6$  at 70 °C with complex **1** ( $[6HDL]_0/[Al] = 100$ ,  $[Al]/[BnOH] = 1$ ,  $[6HDL]_0 = 1.25$ ,  $[Al] = 12.5$  mM).

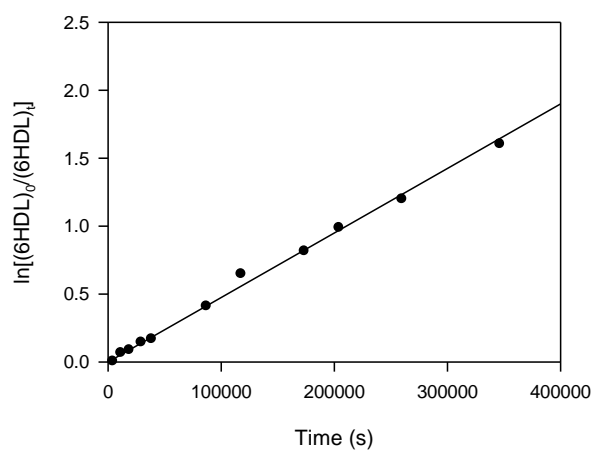

**Fig. S33** Semilogarithmic plot of 6HDL conversion versus time in  $C_6D_6$  at 70 °C with complex **2** ( $[6HDL]_0/[Al] = 100$ ,  $[Al]/[BnOH] = 1$ ,  $[6HDL]_0 = 1.25$ ,  $[Al] = 12.5$  mM).

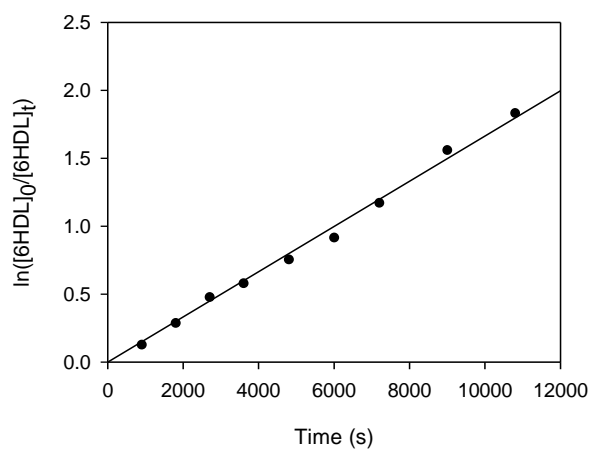

**Fig. S34** Semilogarithmic plot of 6HDL conversion versus time in  $C_6D_6$  at 70 °C with complex **3** ( $[6HDL]_0/[Al] = 100$ ,  $[Al]/[BnOH] = 1$ ,  $[6HDL]_0 = 1.25$ ,  $[Al] = 12.5$  mM).

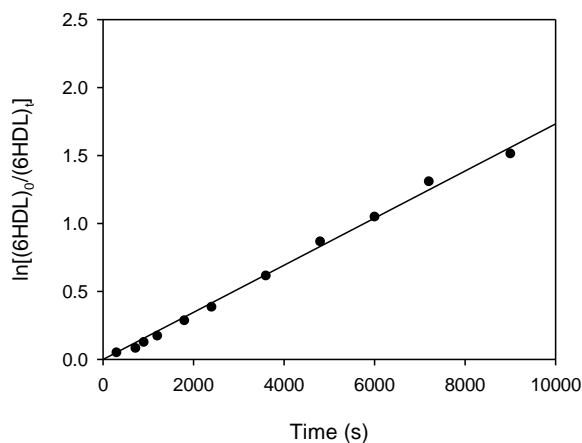

**Fig. S35** Semilogarithmic plot of 6HDL conversion versus time in  $C_6D_6$  at 70 °C with complex **4** ( $[6HDL]_0/[Al] = 100$ ,  $[Al]/[BnOH] = 1$ ,  $[6HDL]_0 = 1.25$ ,  $[Al] = 12.5$  mM).

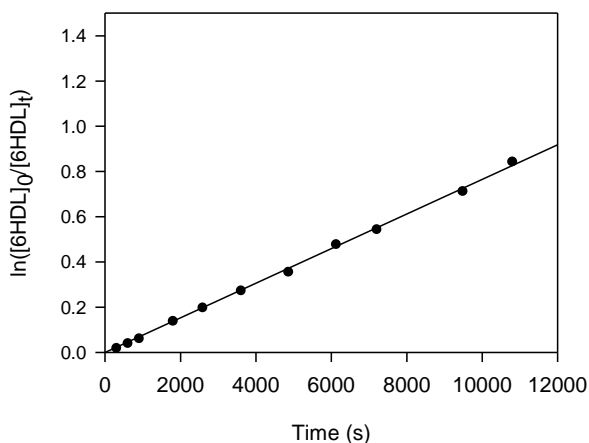

**Fig. S36** Semilogarithmic plot of 6HDL conversion versus time in  $C_6D_6$  at 70 °C with complex **5** ( $[6HDL]_0/[Al] = 100$ ,  $[Al]/[BnOH] = 1$ ,  $[6HDL]_0 = 1.25$ ,  $[Al] = 12.5$  mM).

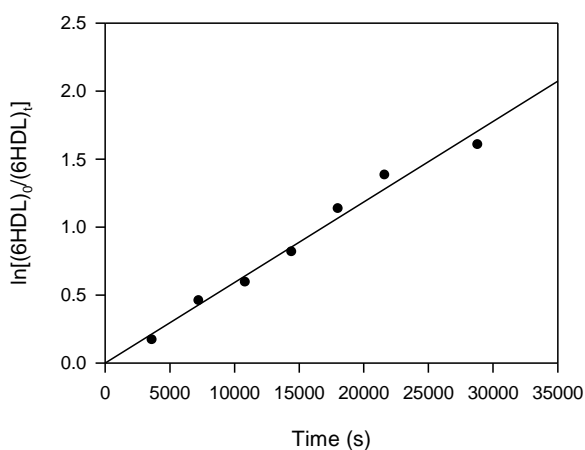

**Fig. S37** Semilogarithmic plot of 6HDL conversion versus time in  $C_6D_6$  at 70 °C with complex **6** ( $[6HDL]_0/[Al] = 100$ ,  $[Al]/[BnOH] = 1$ ,  $[6HDL]_0 = 1.25$ ,  $[Al] = 12.5$  mM).

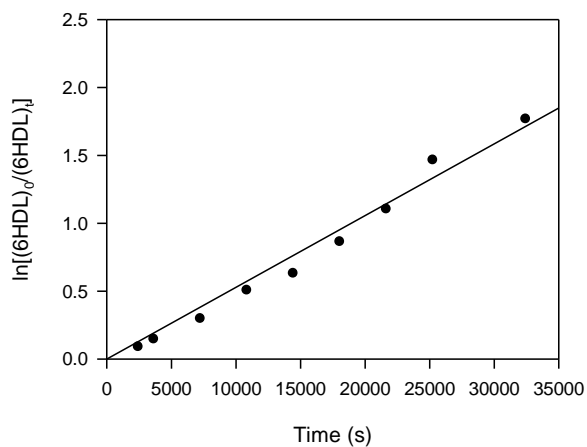

**Fig. S38** Semilogarithmic plot of 6HDL conversion versus time in  $C_6D_6$  at 70 °C with complex **7** ( $[6HDL]_0/[Al] = 100$ ,  $[Al]/[BnOH] = 1$ ,  $[6HDL]_0 = 1.25$ ,  $[Al] = 12.5$  mM).

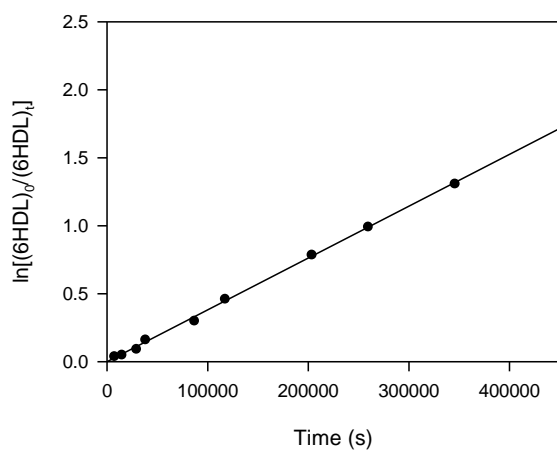

**Fig. S39** Semilogarithmic plot of 6HDL conversion versus time in  $C_6D_6$  at 70 °C with complex **8** ( $[6HDL]_0/[Al] = 100$ ,  $[Al]/[BnOH] = 1$ ,  $[6HDL]_0 = 1.25$ ,  $[Al] = 12.5$  mM).

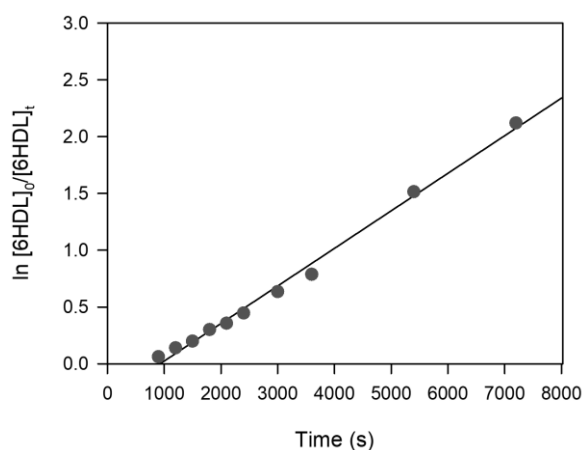

**Fig. S40** Semilogarithmic plot of 6HDL conversion versus time in  $C_6D_6$  at 70 °C with complex **9** ( $[6HDL]_0/[Al] = 100$ ,  $[Al]/[BnOH] = 1$ ,  $[6HDL]_0 = 1.25$ ,  $[Al] = 12.5$  mM).

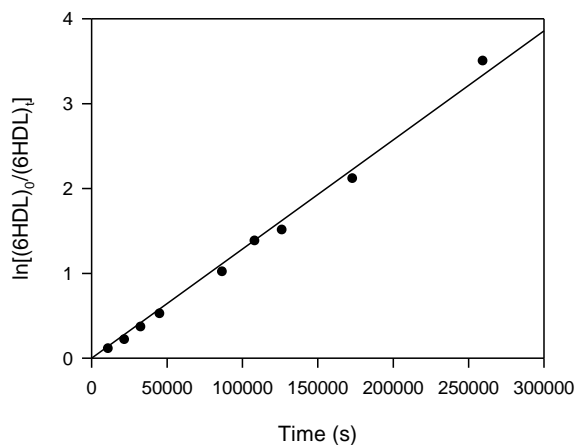

**Fig. S41** Semilogarithmic plot of 6HDL conversion versus time in  $\text{C}_6\text{D}_6$  at  $70\text{ }^\circ\text{C}$  with complex **10** ( $[\text{P6HDL}]_0/[\text{Al}] = 100$ ,  $[\text{Al}]/[\text{BnOH}] = 1$ ,  $[\text{6HDL}]_0 = 1.25$ ,  $[\text{Al}] = 12.5\text{ mM}$ ).

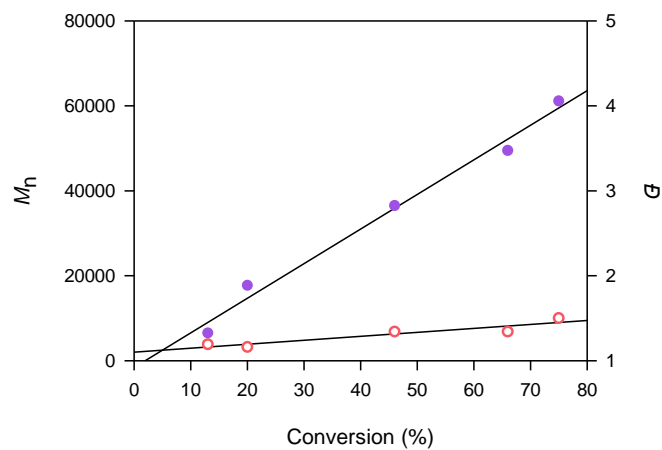

**Fig. S42** Plot of the HDL  $M_n$  ( $\bullet$ ) (versus polystyrene standards) and  $D$  ( $\circ$ ) as a function of monomer conversion for HDL using **9**/BnOH as an initiator ( $[\text{HDL}]_0/[\text{Al}] = 100$ ,  $\text{C}_6\text{D}_6$ ,  $70\text{ }^\circ\text{C}$ ).

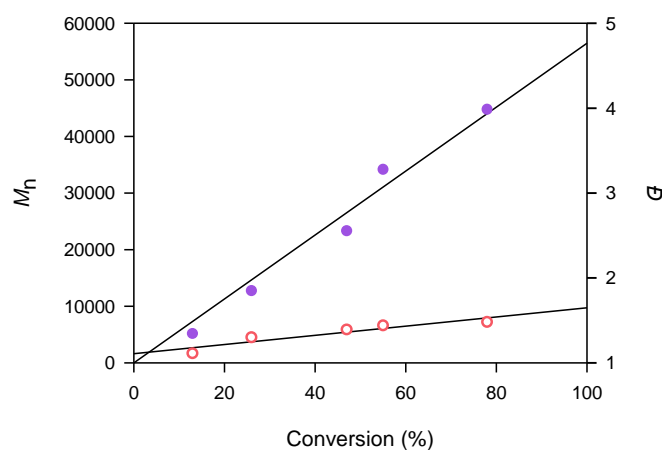

**Fig. S43** Plot of the 6HDL  $M_n$  ( $\bullet$ ) (versus polystyrene standards) and PDI ( $\circ$ ) as a function of monomer conversion for 6HDL using **9**/BnOH as an initiator ( $[\text{6HDL}]_0/[\text{Al}] = 100$ ,  $\text{C}_6\text{D}_6$ ,  $70\text{ }^\circ\text{C}$ ).

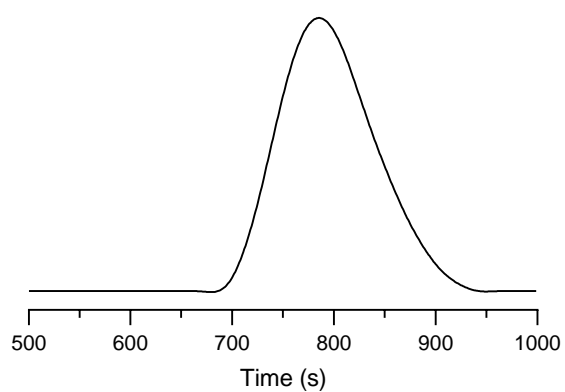

**Fig. S44** GPC curve of Poly(PDL-*b*-L-LA) using complex **9** (Table 6, entry 1)

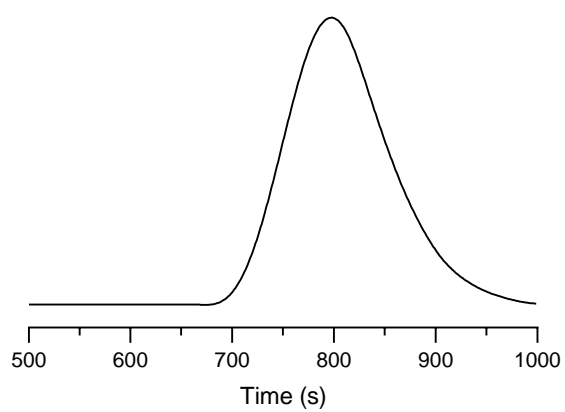

**Fig. S45** GPC curve of Poly(L-LA-*co*-PDL) using complex **9** (Table 6, entry 2)

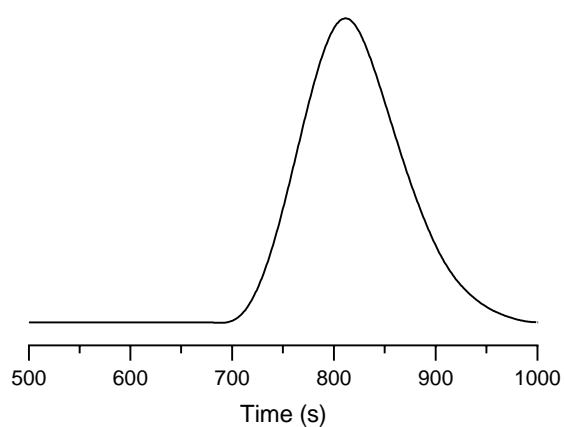

**Fig. S46** GPC curve of Poly(L-LA-*co*-PDL) using complex **9** (Table 6, entry 3)



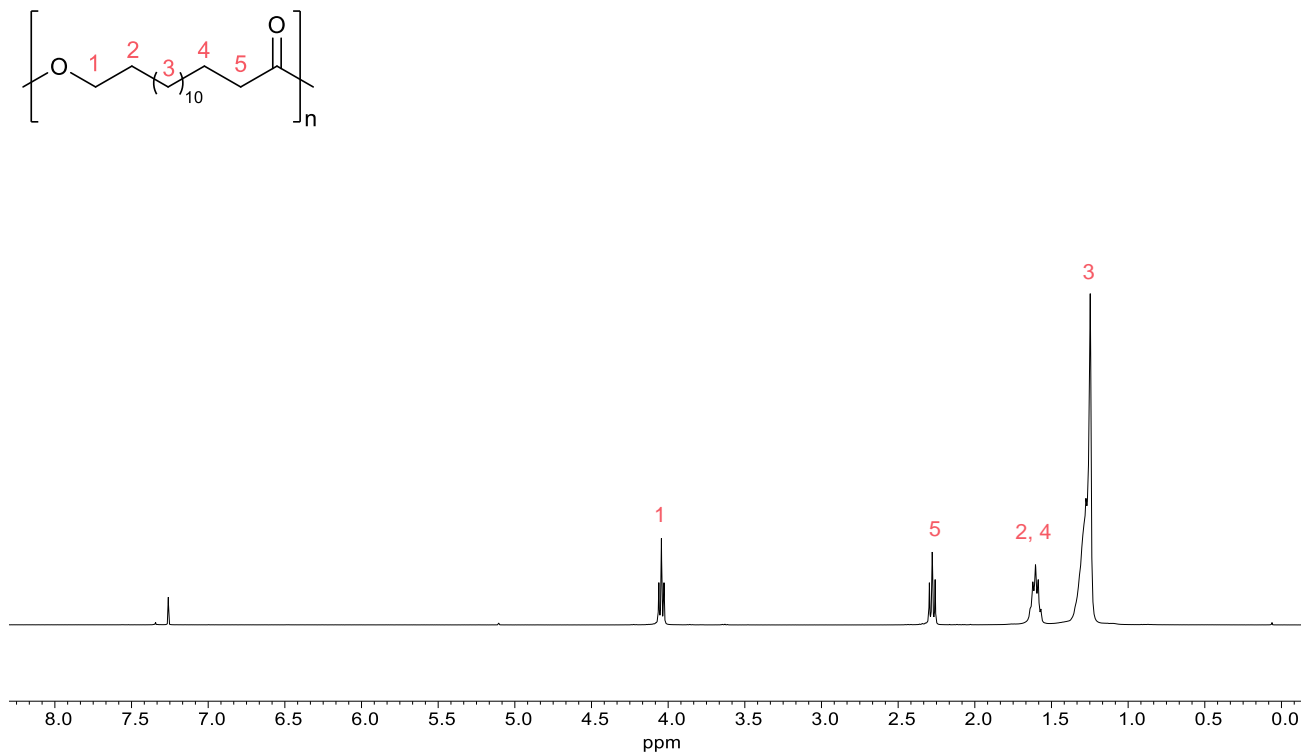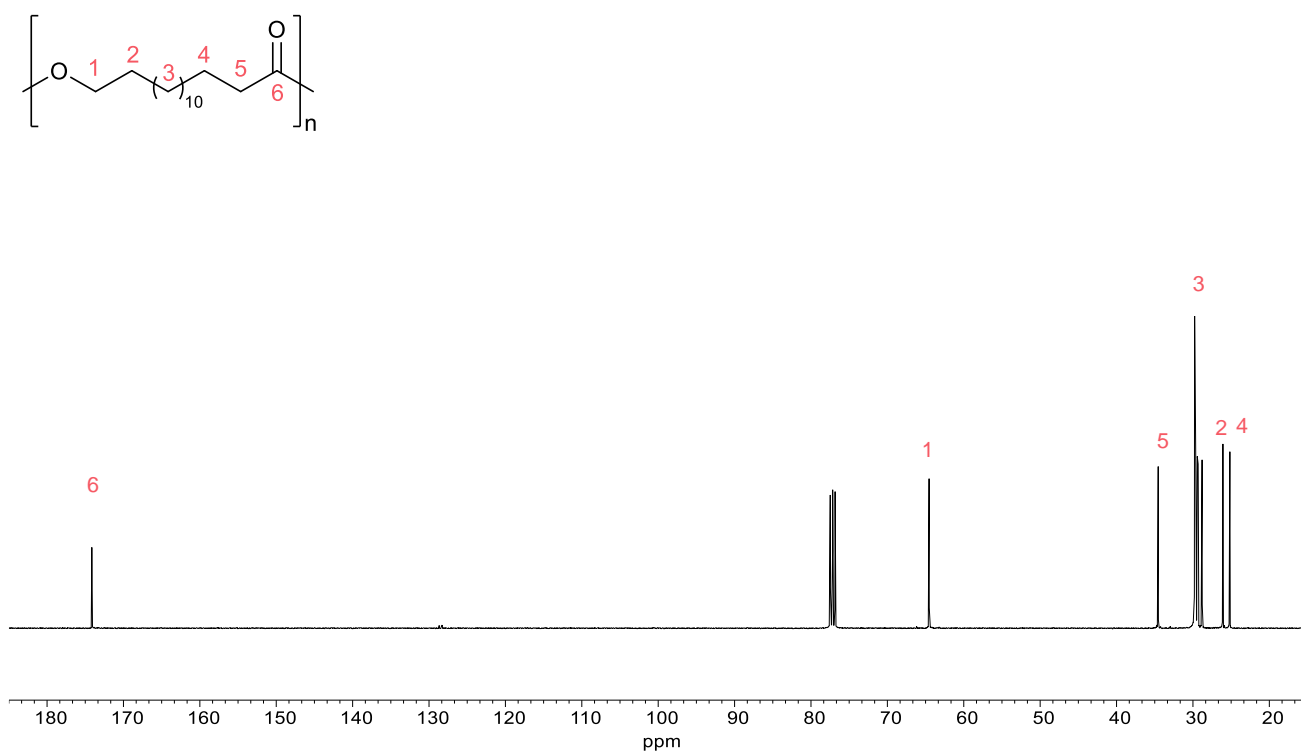

**Fig. S47**  $^1\text{H}$  and  $^{13}\text{C}\{^1\text{H}\}$  NMR spectra of poly(pentadecalactone) (PPDL) in  $\text{CDCl}_3$  at 298 K.

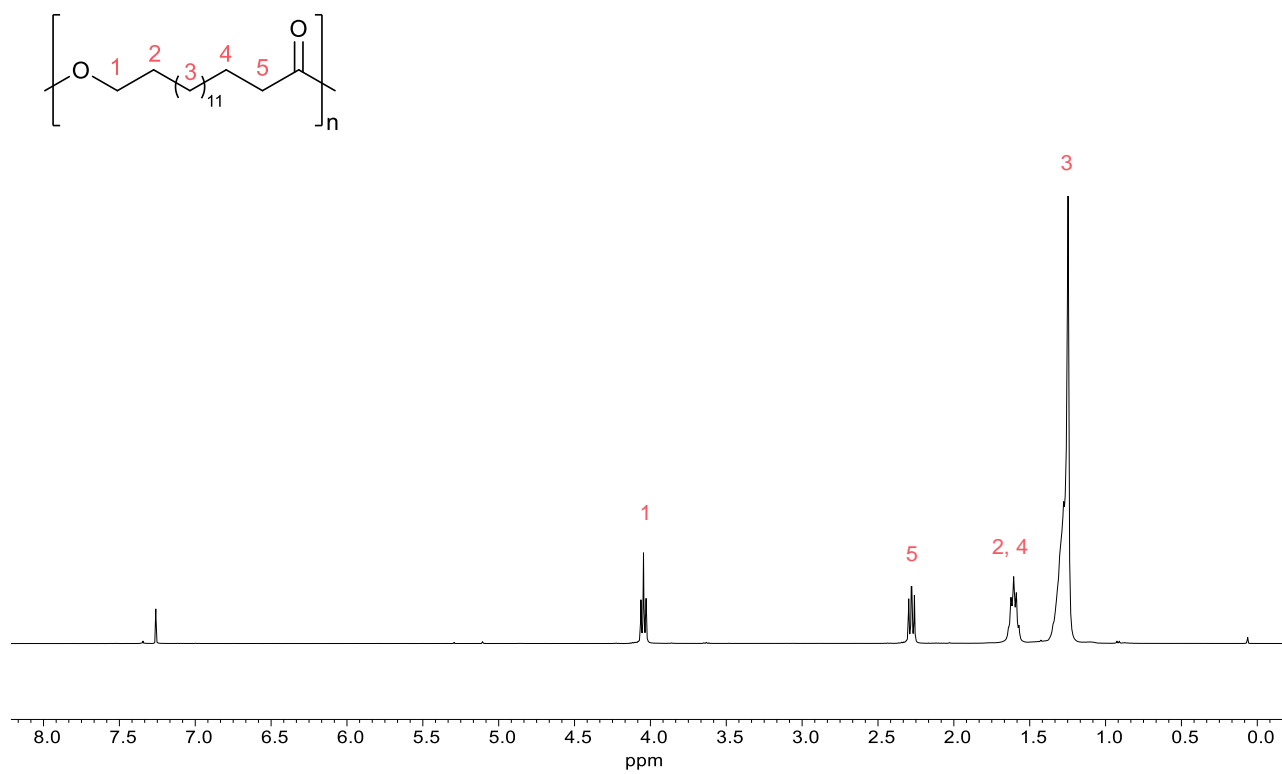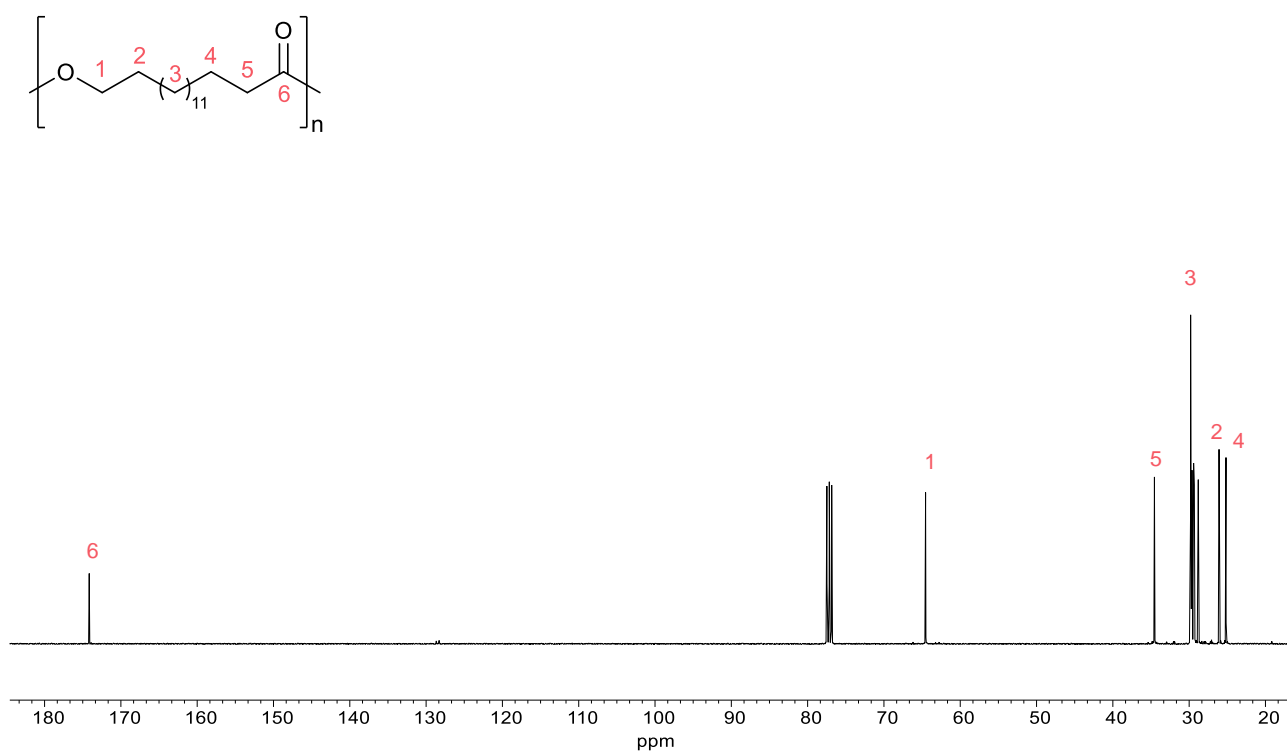

**Fig. S48**  $^1\text{H}$  and  $^{13}\text{C}\{^1\text{H}\}$  NMR spectra of polyhexadecalactone (PHDL) in  $\text{CDCl}_3$  at 298 K.

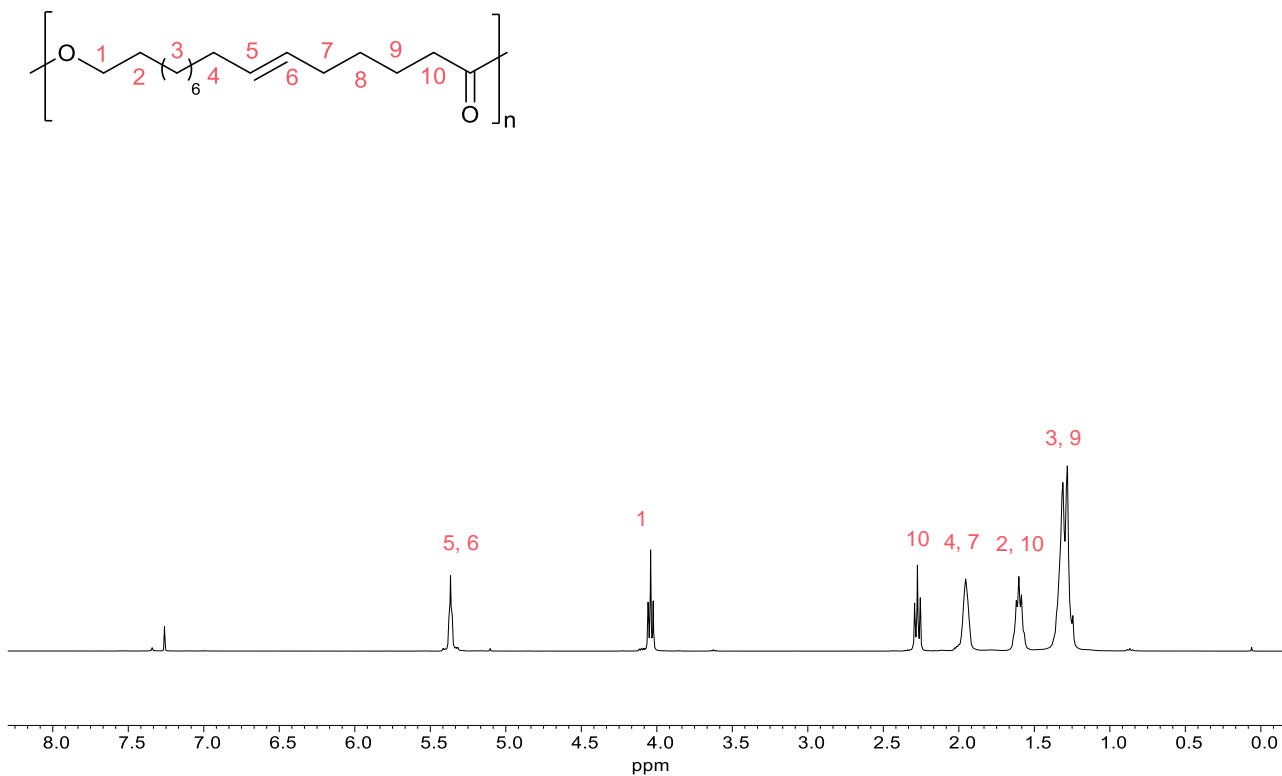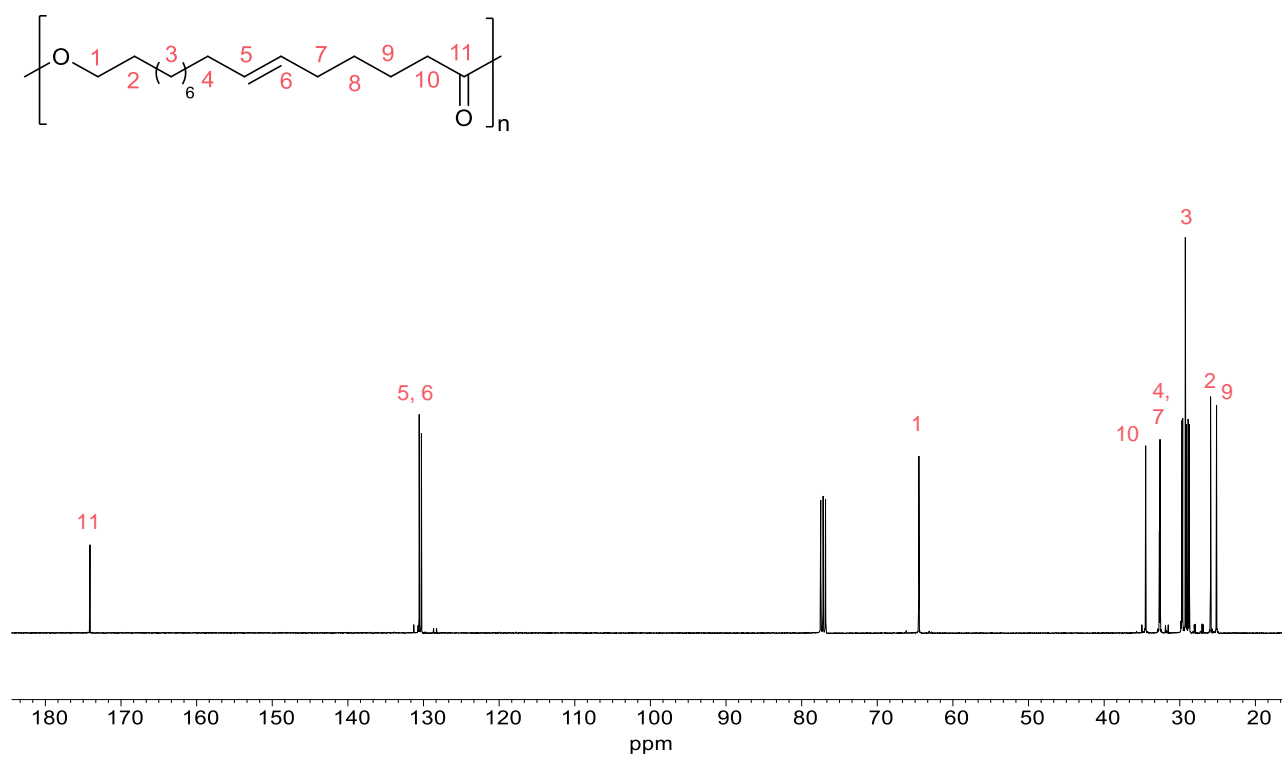

**Fig. S49**  $^1\text{H}$  and  $^{13}\text{C}\{^1\text{H}\}$  NMR spectra of poly( $\omega$ -6-hexadecenlactone, 6HDL) in  $\text{CDCl}_3$  at 298 K.

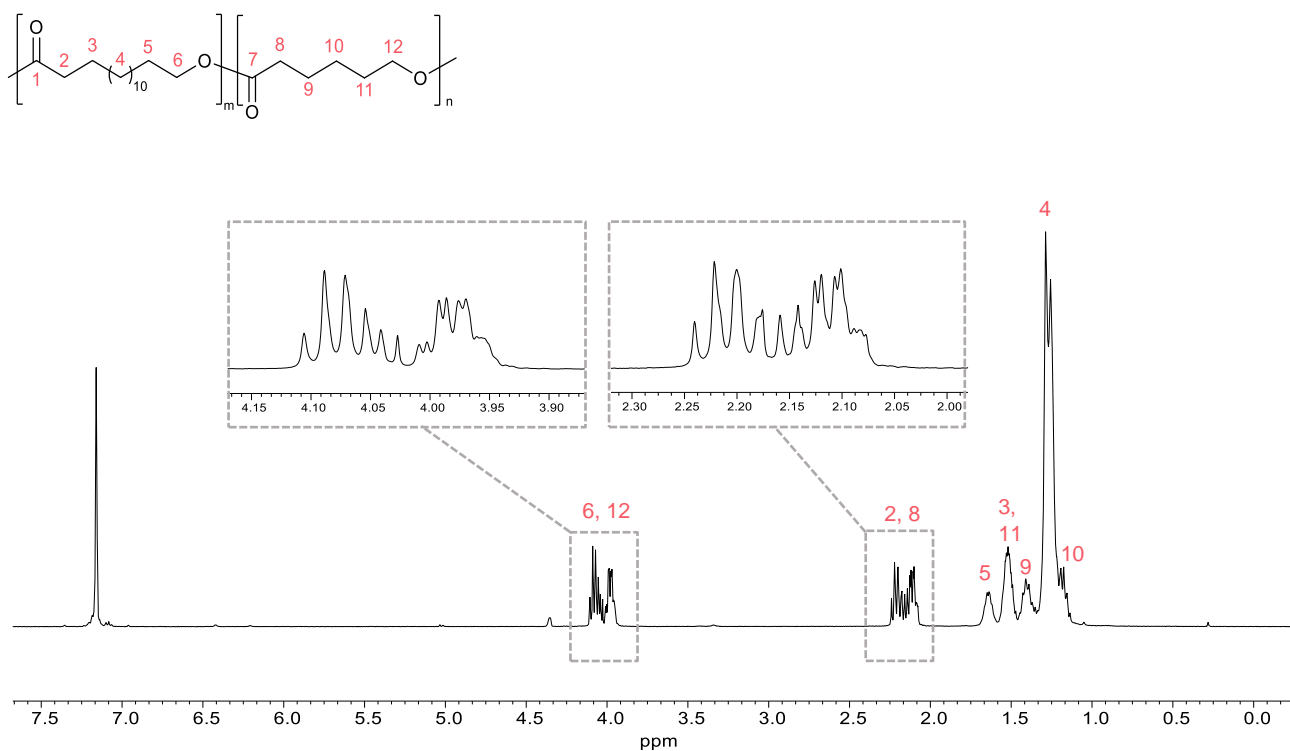

**Fig. S50**  $^1\text{H}$  NMR spectrum of poly(PDL-co-CL) in  $\text{C}_6\text{D}_6$  at 298 K (Table 4, entry 1).

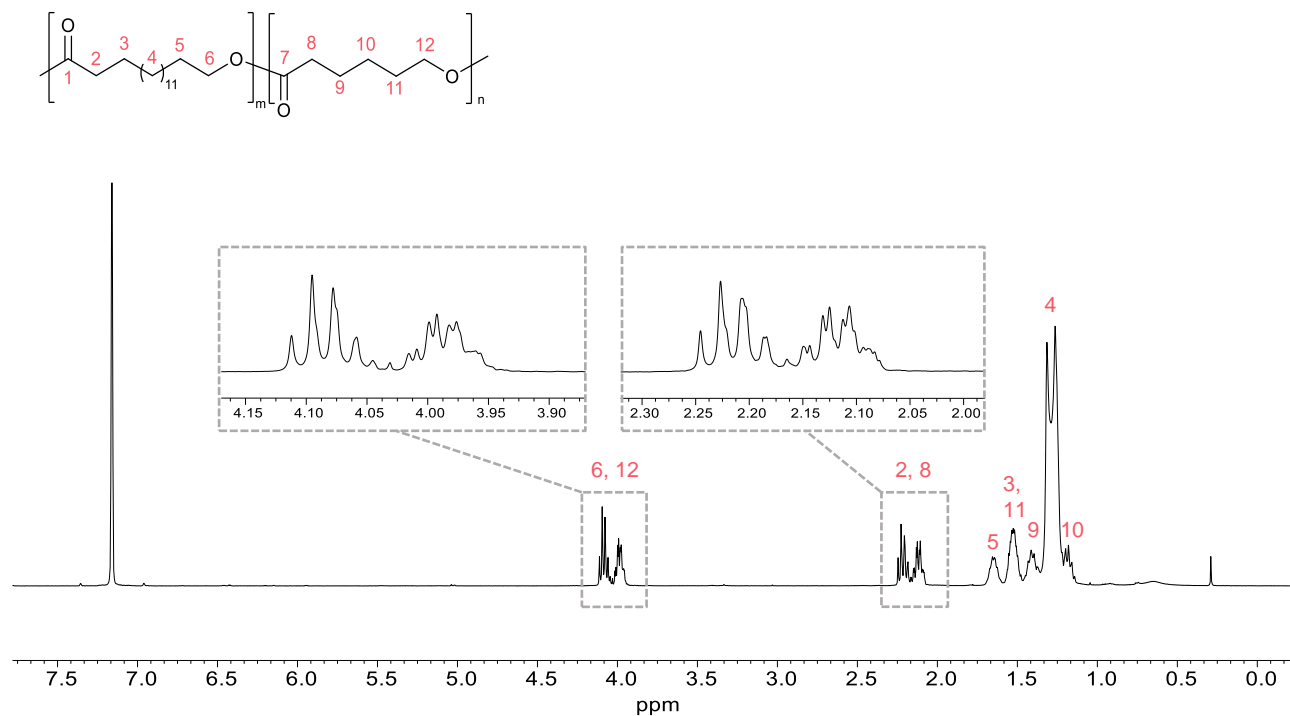

**Fig. S51**  $^1\text{H}$  NMR spectrum of poly(HDL-co-CL) in  $\text{C}_6\text{D}_6$  at 298 K (Table 4, entry 2).

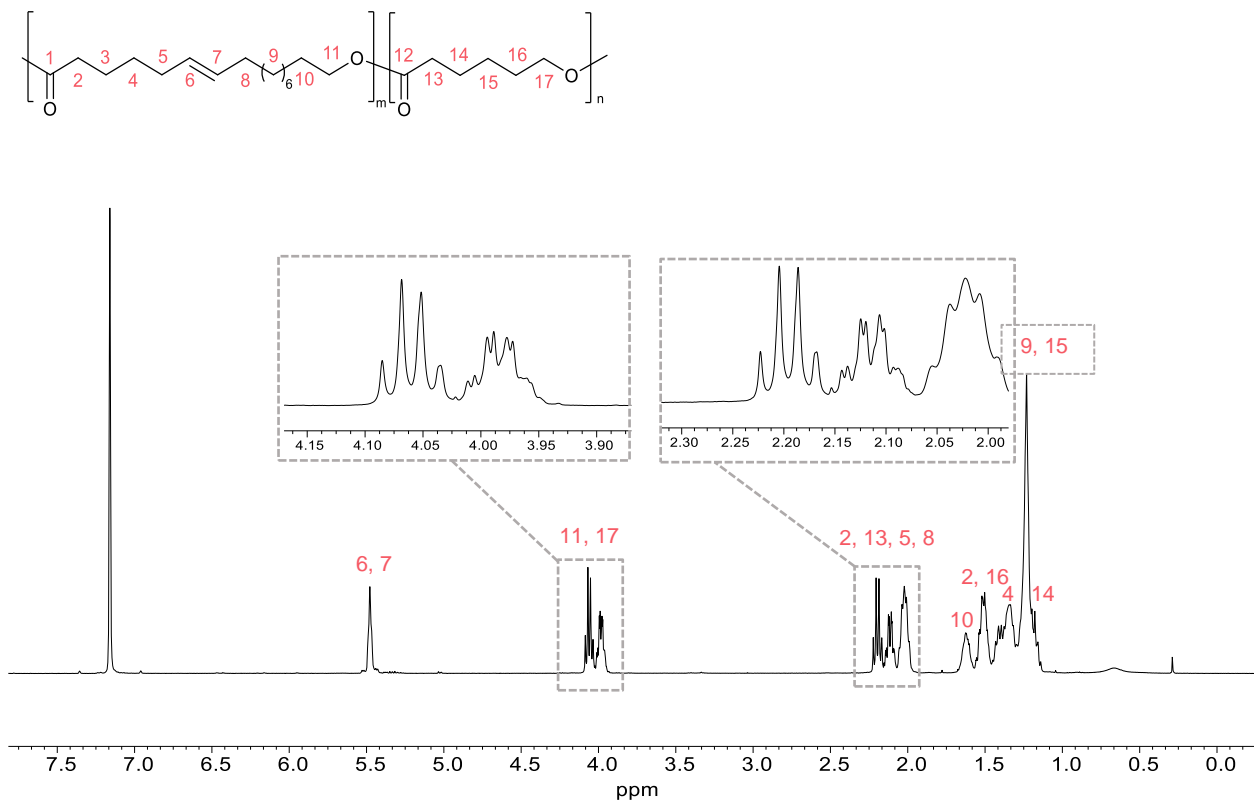

**Fig. S52** <sup>1</sup>H NMR spectrum of poly(6HDL-*co*-CL) in C<sub>6</sub>D<sub>6</sub> at 298 K (Table 4, entry 3).

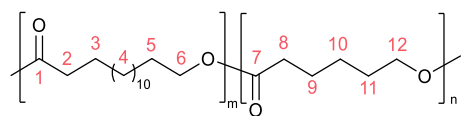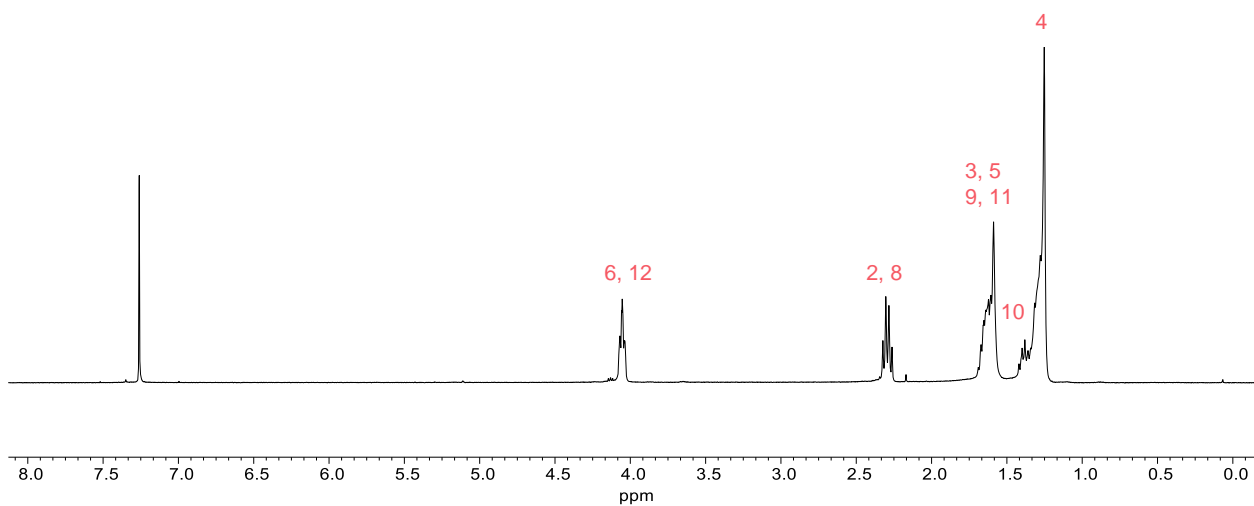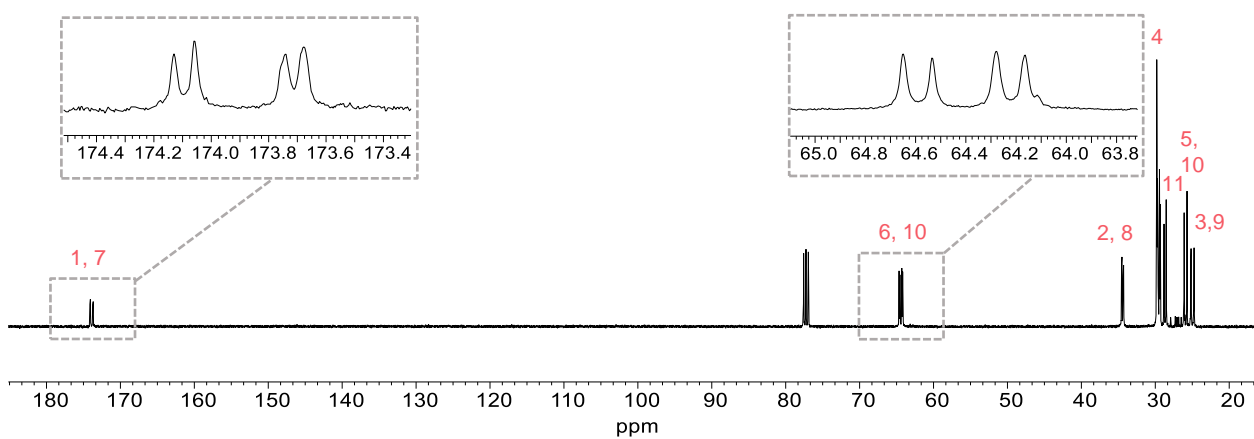

**Fig. S53**  $^1\text{H}$  and  $^{13}\text{C}\{^1\text{H}\}$  NMR spectra of poly(PDL-co-CL) in  $\text{CDCl}_3$  at 298 K (Table 4, entry 1).

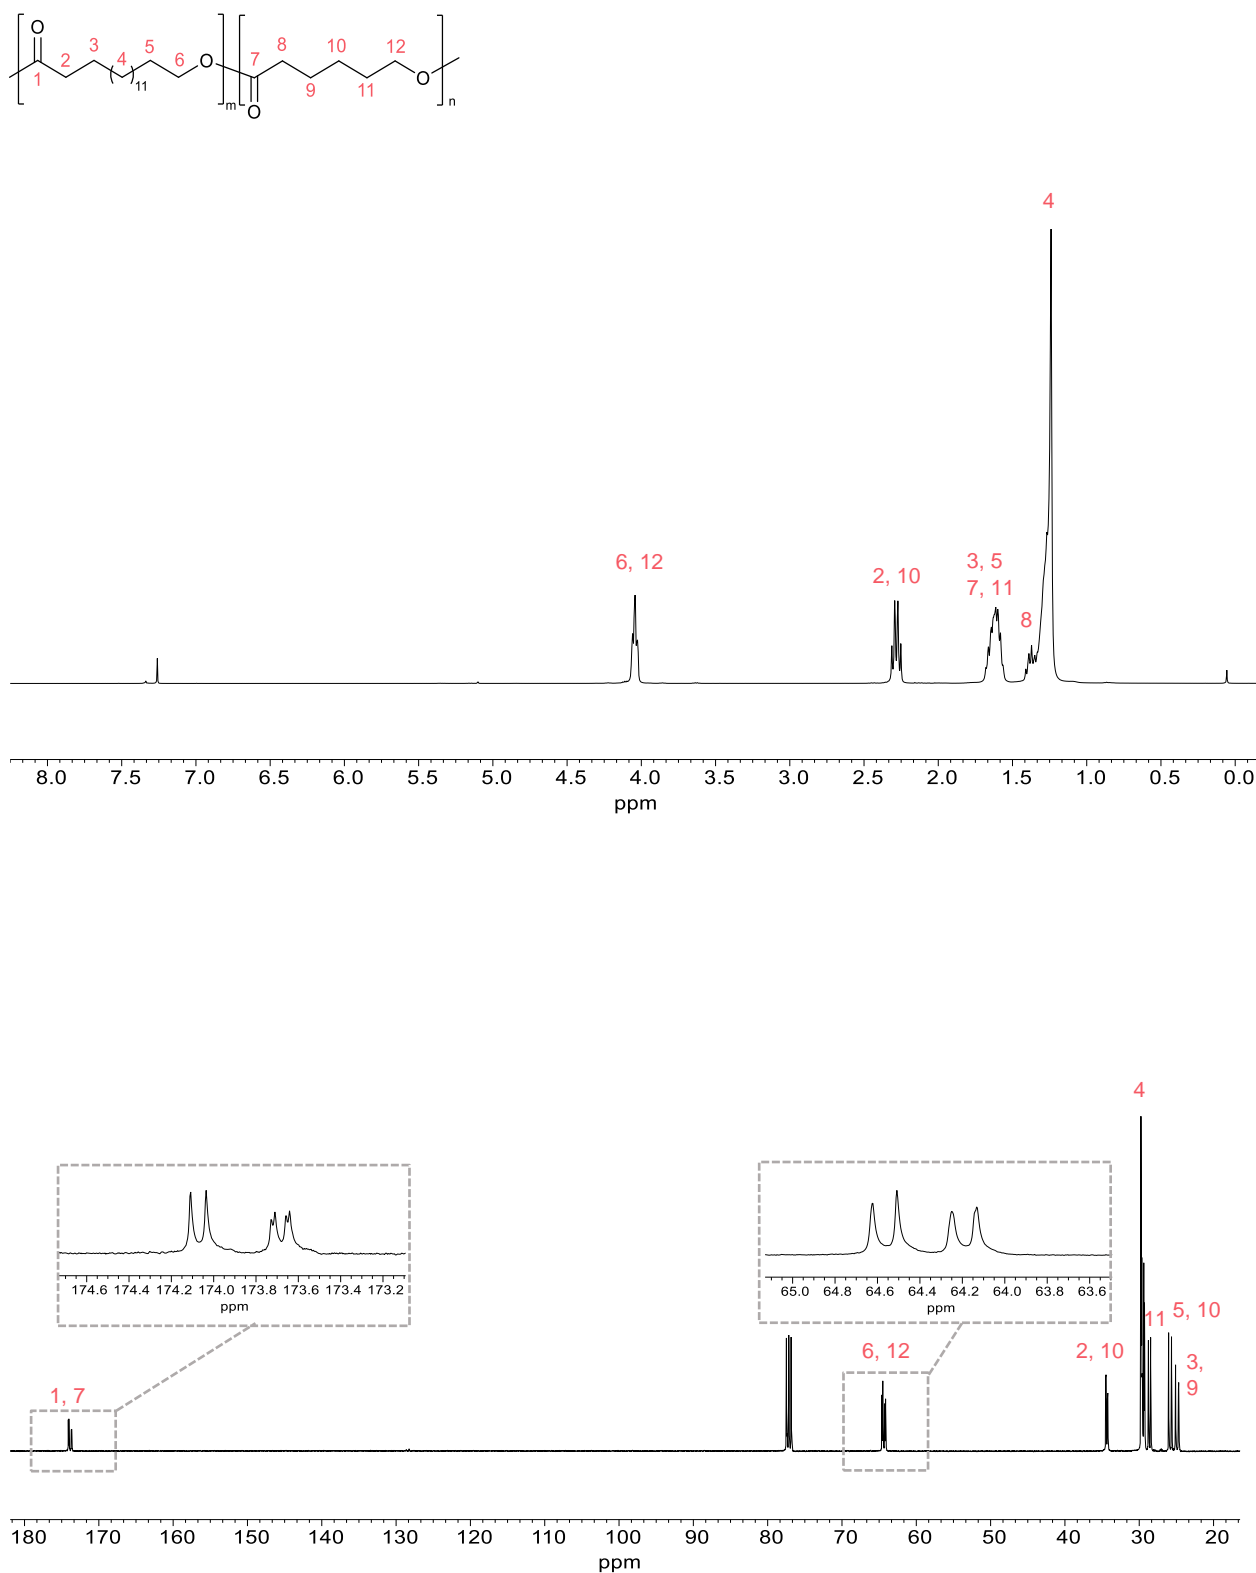

**Fig. S54**  $^1\text{H}$  and  $^{13}\text{C}\{^1\text{H}\}$  NMR spectra of poly(HDL-co-CL) in  $\text{CDCl}_3$  at 298 K (Table 4, entry 2).

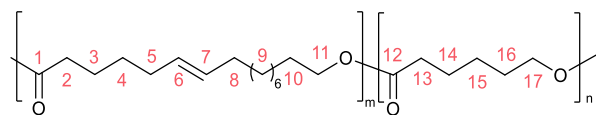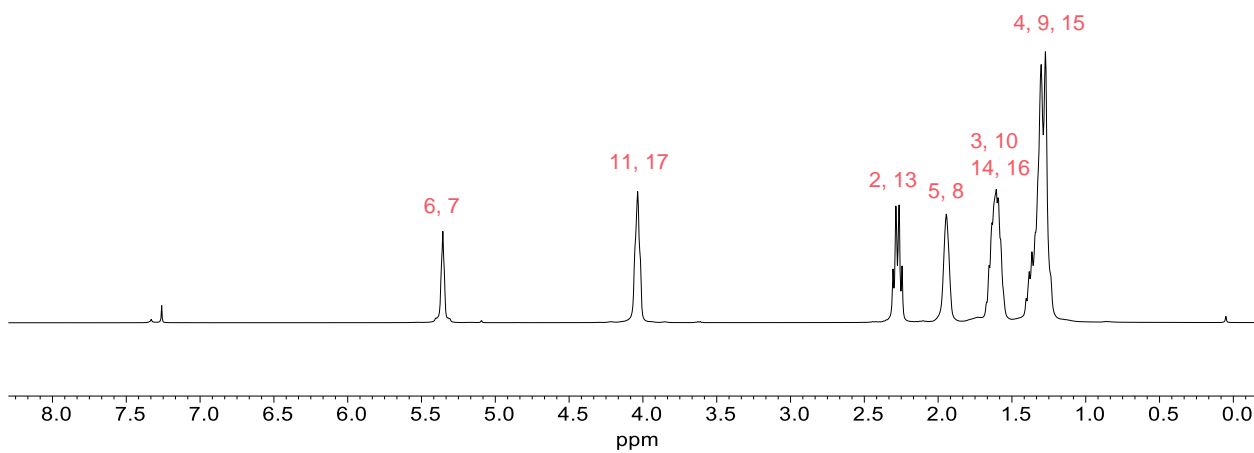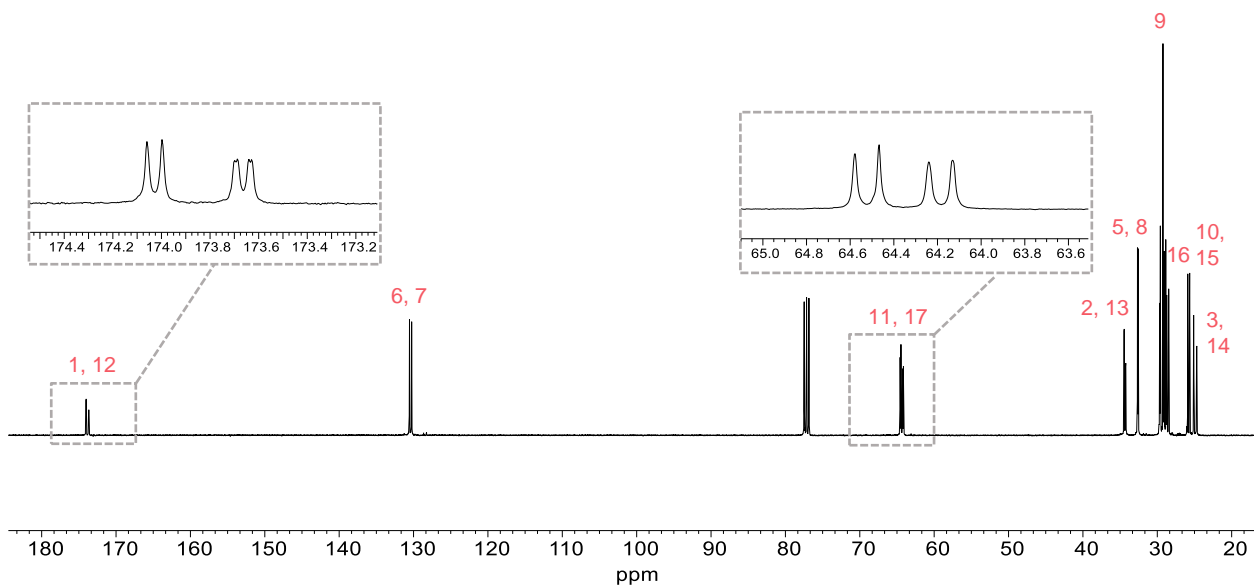

**Fig. S55**  $^1\text{H}$  and  $^{13}\text{C}\{^1\text{H}\}$  NMR spectra of poly(6HDL-*co*-CL) in  $\text{CDCl}_3$  at 298 K (Table 4, entry 3).



## Sequential monomer addition

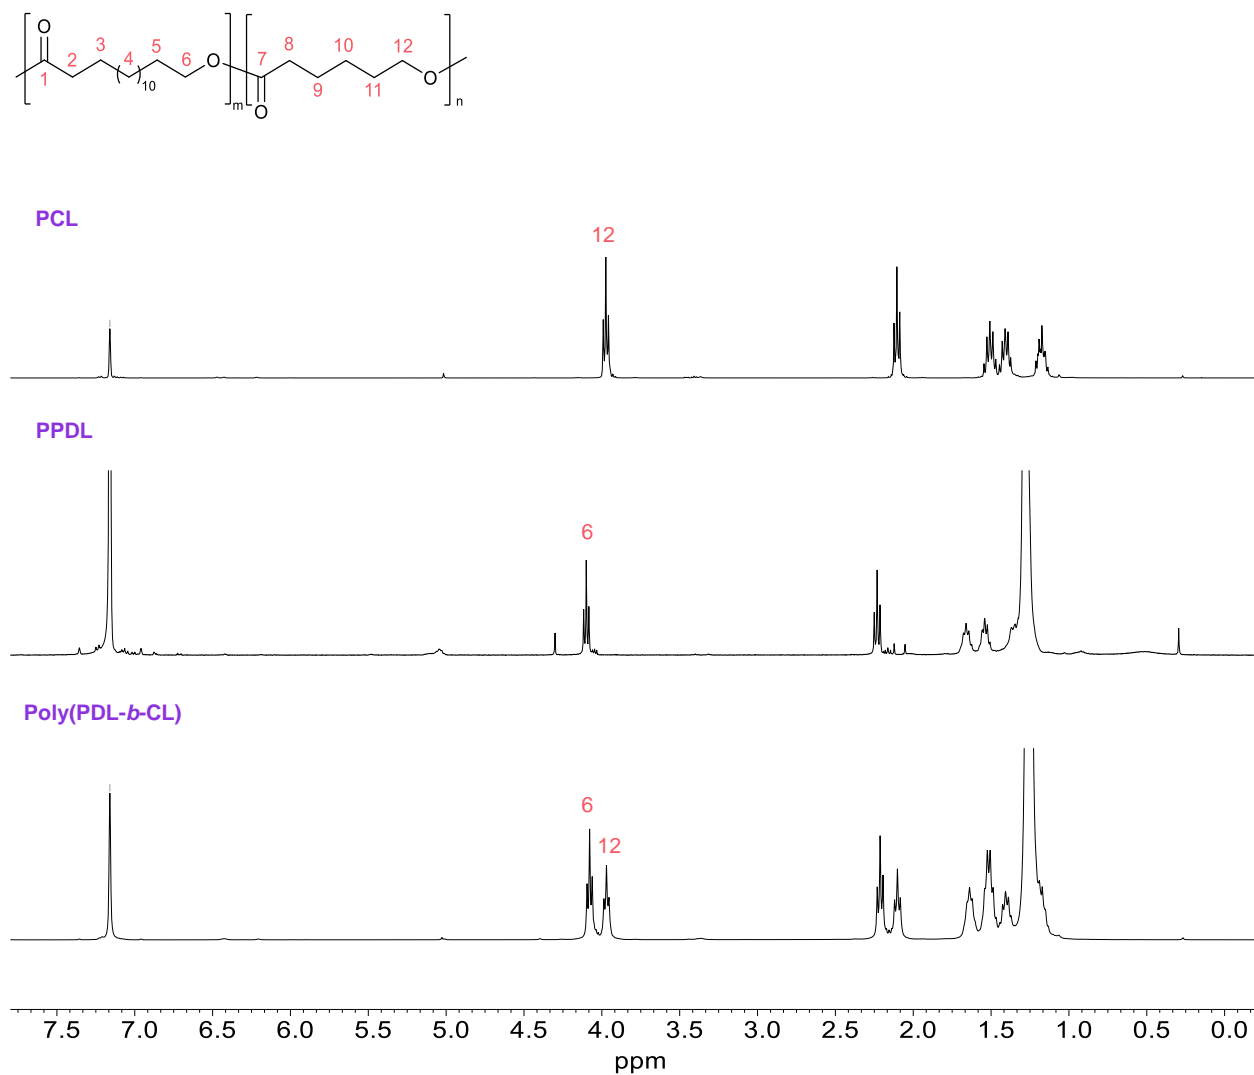

**Fig. S56**  $^1\text{H}$  NMR spectra of poly(PDL-*b*-CL) in  $\text{C}_6\text{D}_6$  at 298 K.

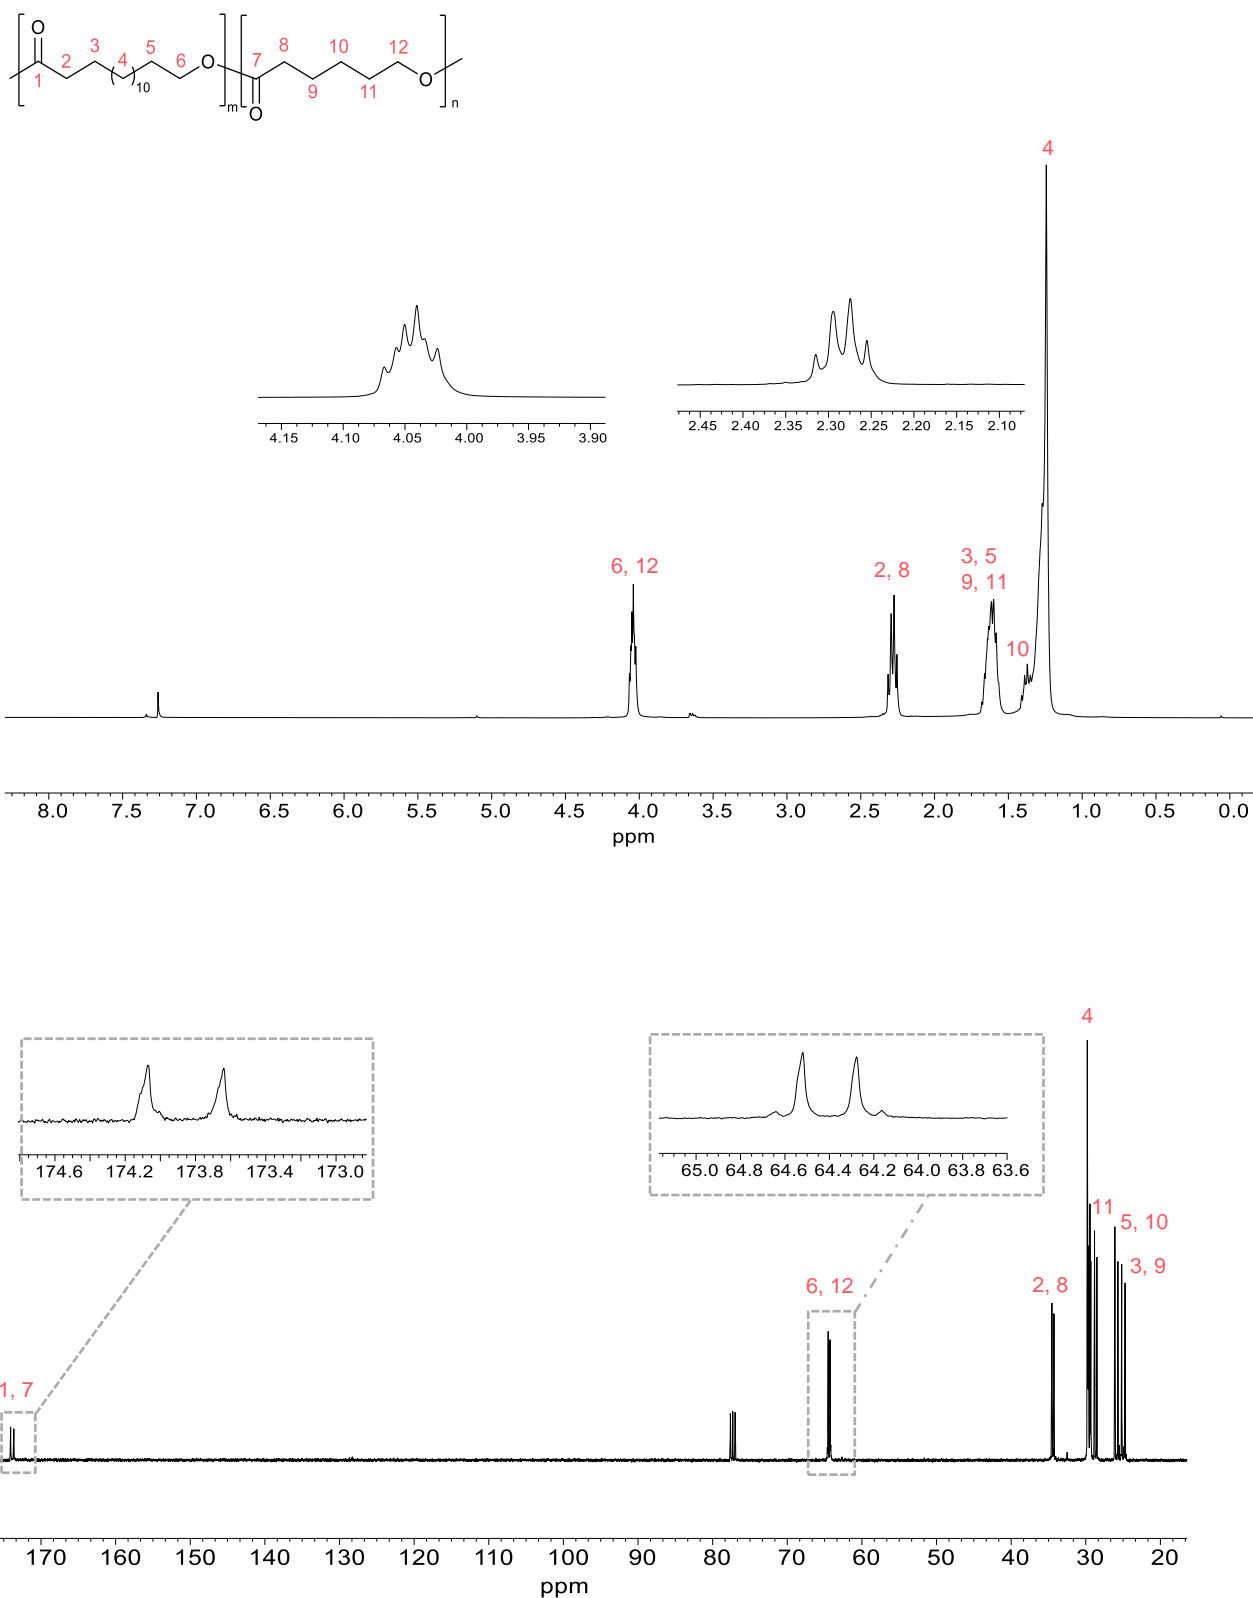

**Fig. S57**  $^1\text{H}$  and  $^{13}\text{C}\{^1\text{H}\}$  NMR spectra of poly(PDL-*b*-CL) in  $\text{CDCl}_3$  at 298 K (Table 4, entry 4).

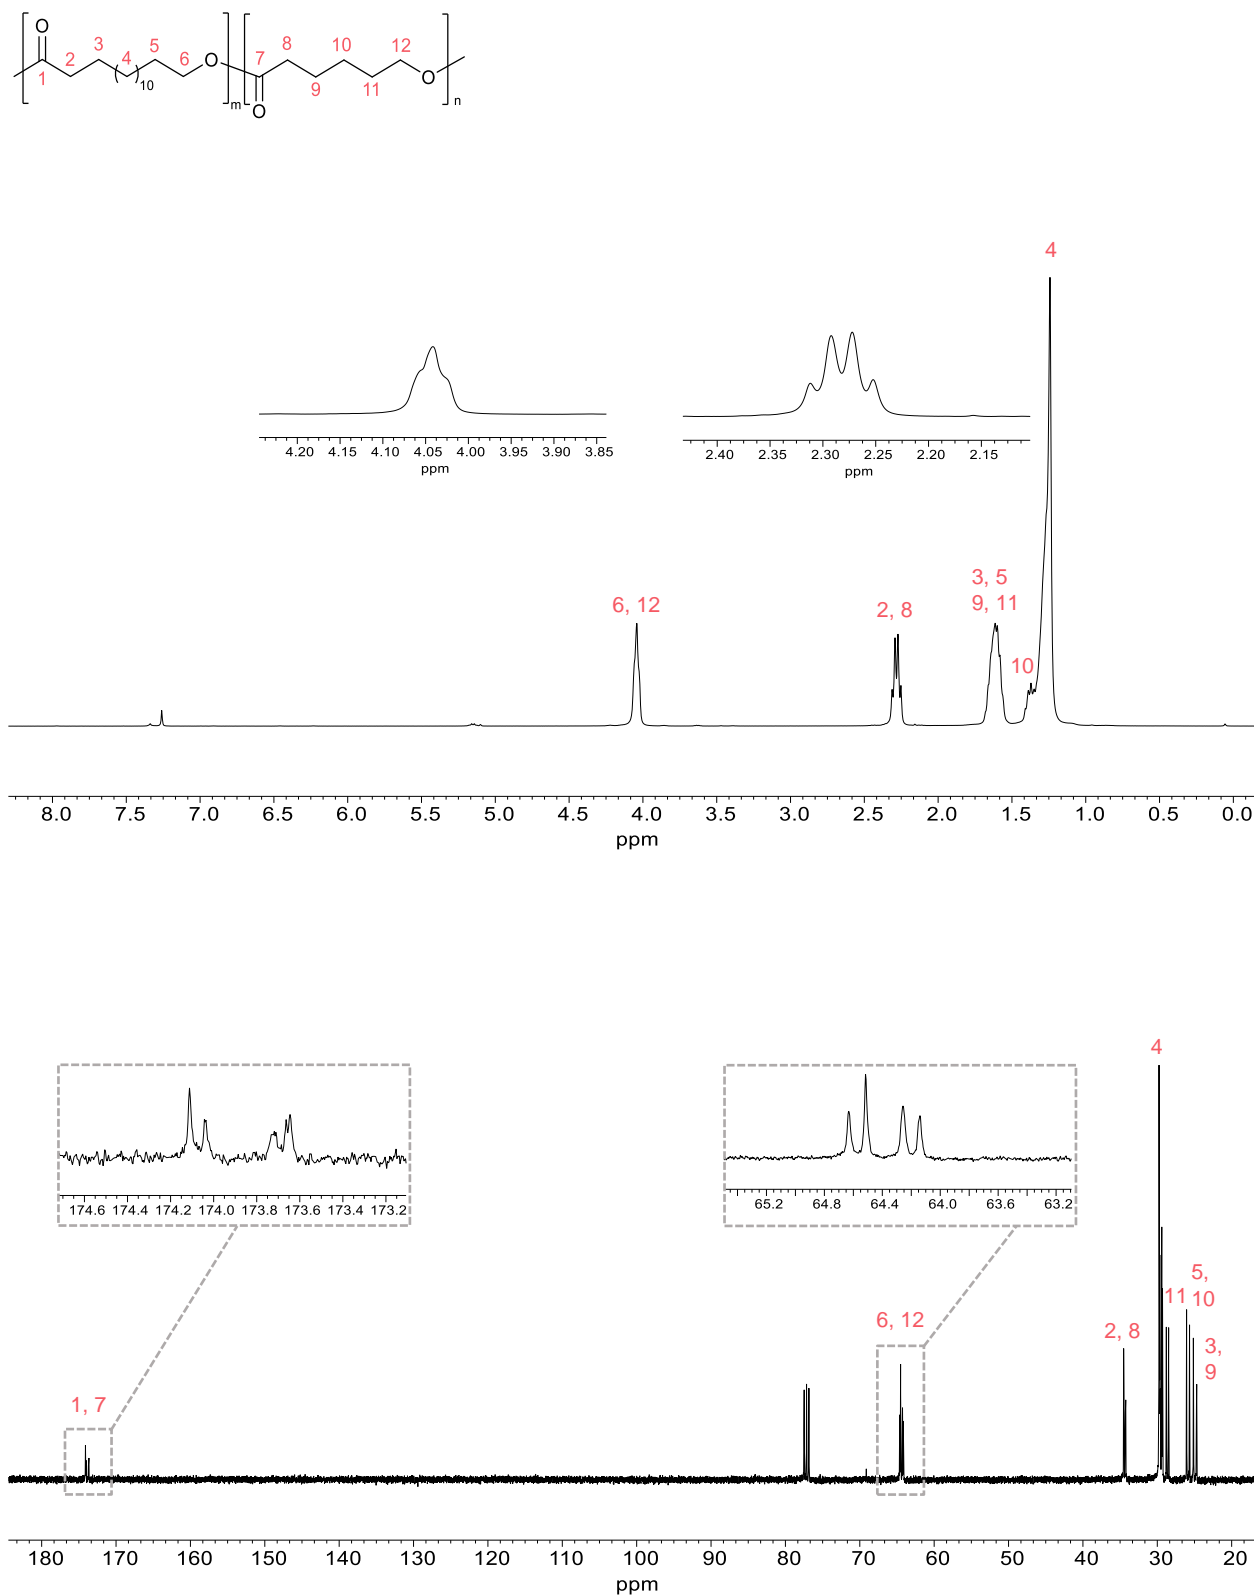

**Fig. S58**  $^1\text{H}$  and  $^{13}\text{C}\{^1\text{H}\}$  NMR spectra of poly(PDL-co-CL) in  $\text{CDCl}_3$  at 298 K (Table 4, entry 5).

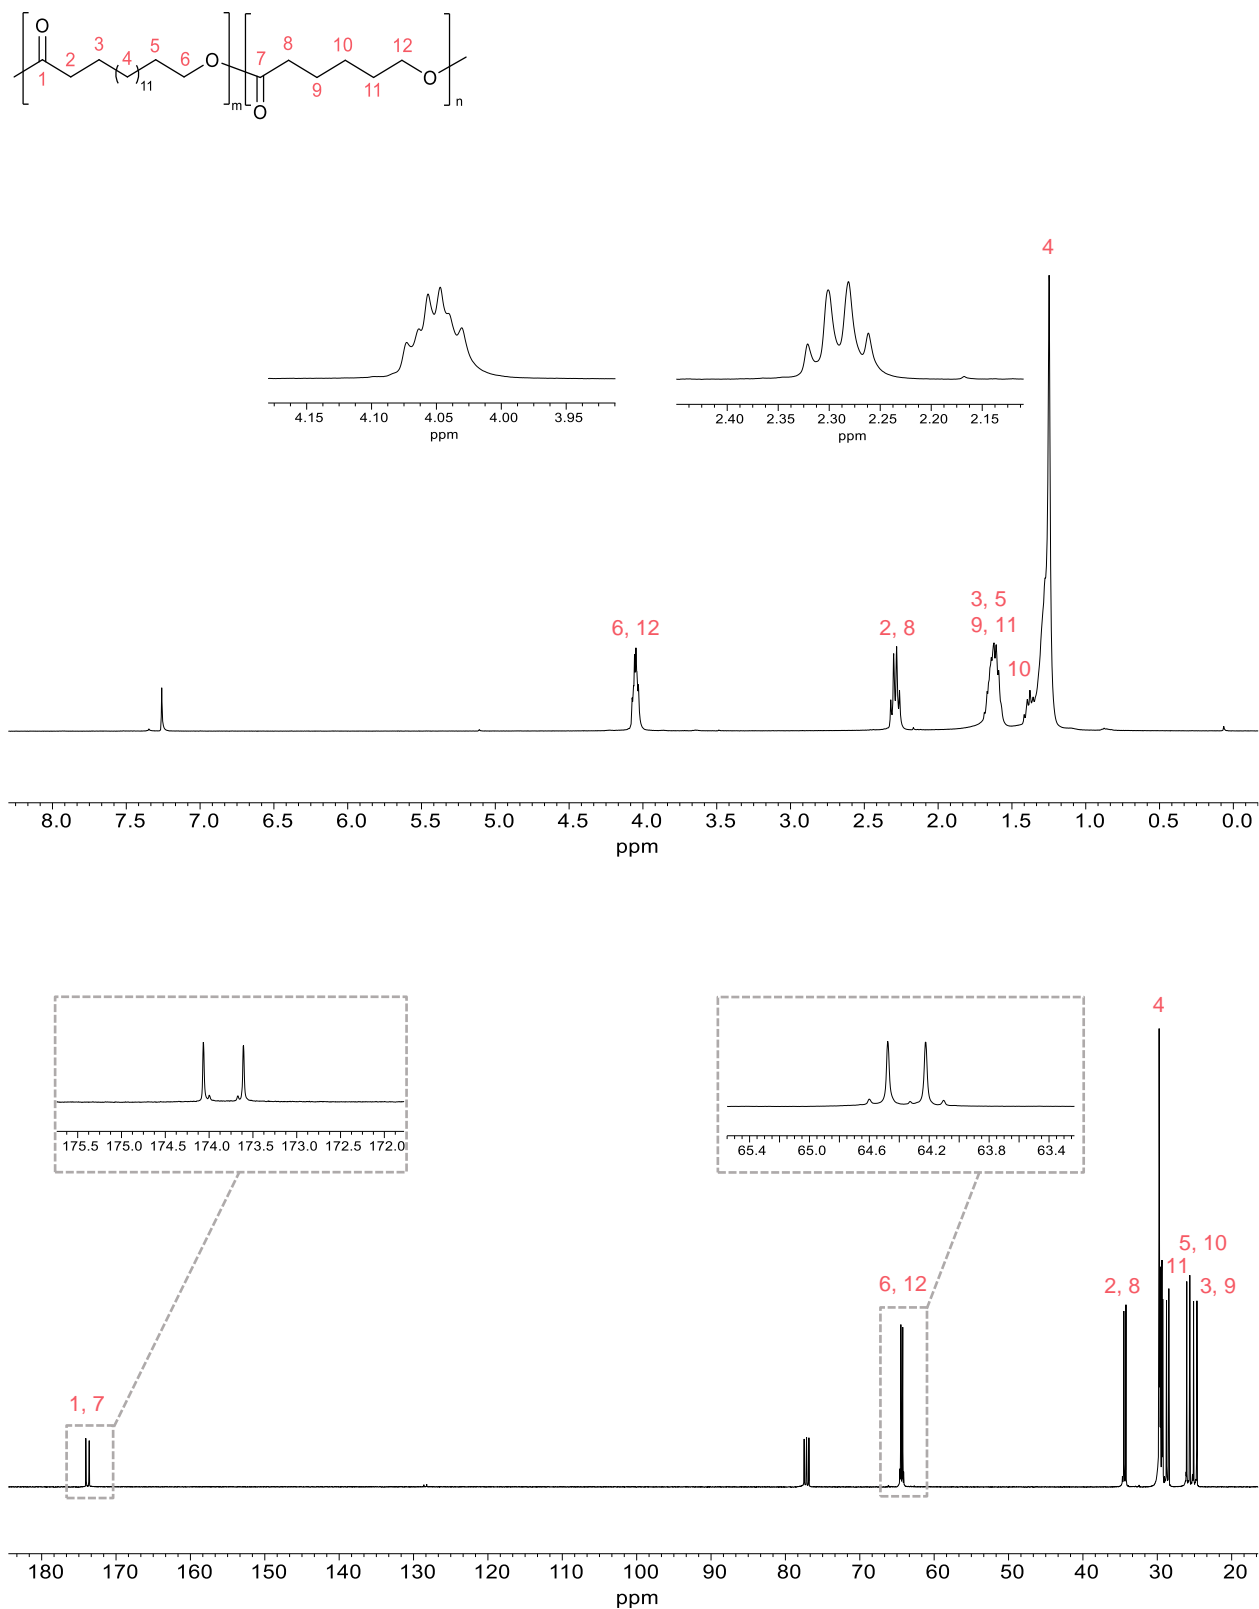

**Fig. S59**  $^1\text{H}$  and  $^{13}\text{C}\{^1\text{H}\}$  NMR spectra of poly(HDL-*b*-CL) in  $\text{CDCl}_3$  at 298 K (Table 4, entry 6).

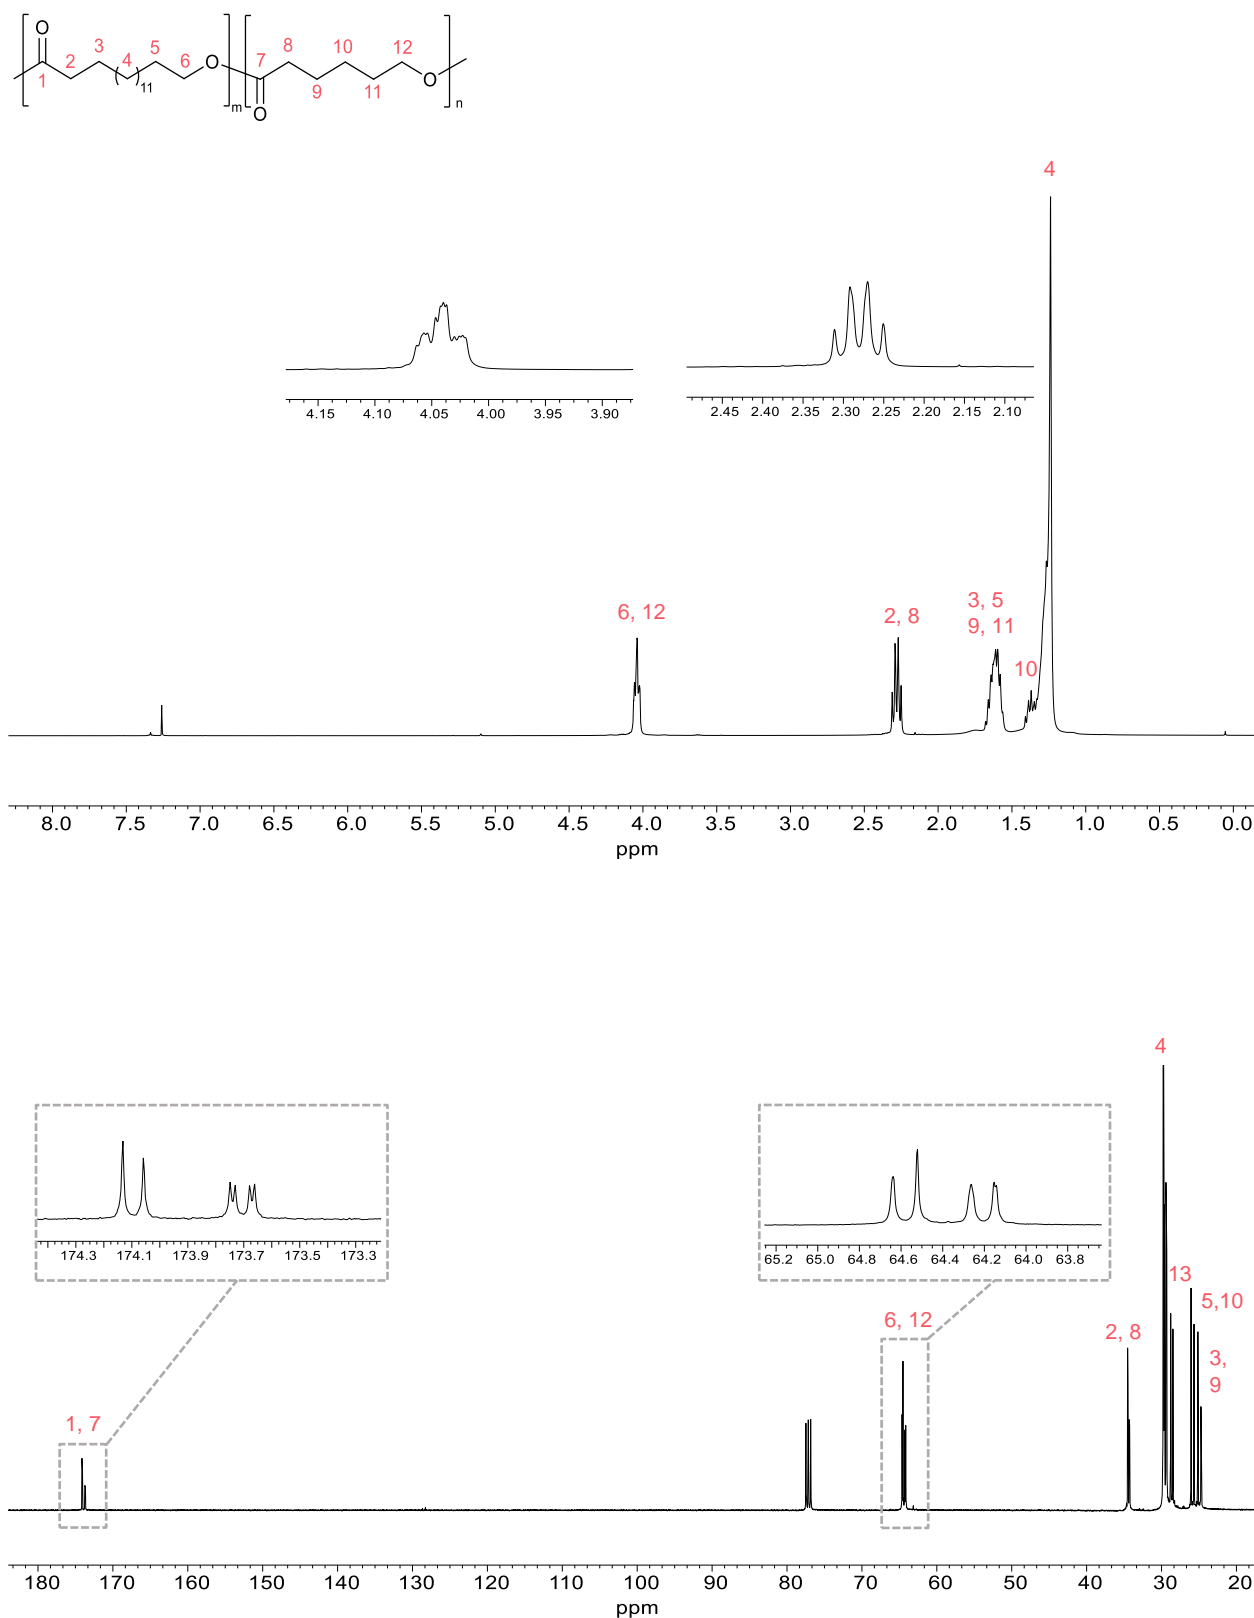

**Fig. S60**  $^1\text{H}$  and  $^{13}\text{C}\{^1\text{H}\}$  NMR spectra of poly(HDL-co-CL) in  $\text{CDCl}_3$  at 298 K (Table 4, entry 7).

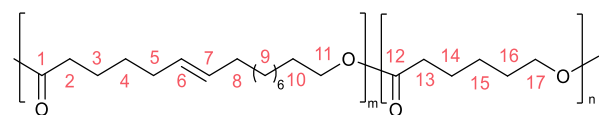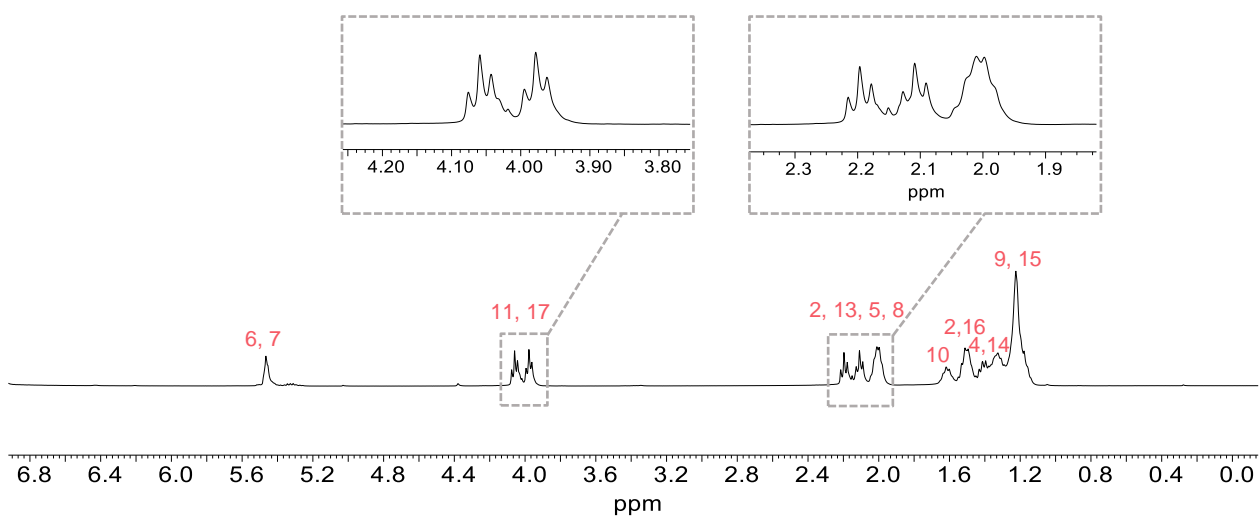

**Fig. S61**  $^1\text{H}$  NMR spectrum of poly(6HDL-*b*-CL) in  $\text{C}_6\text{D}_6$  at 298 K (Table 4, entry 8).

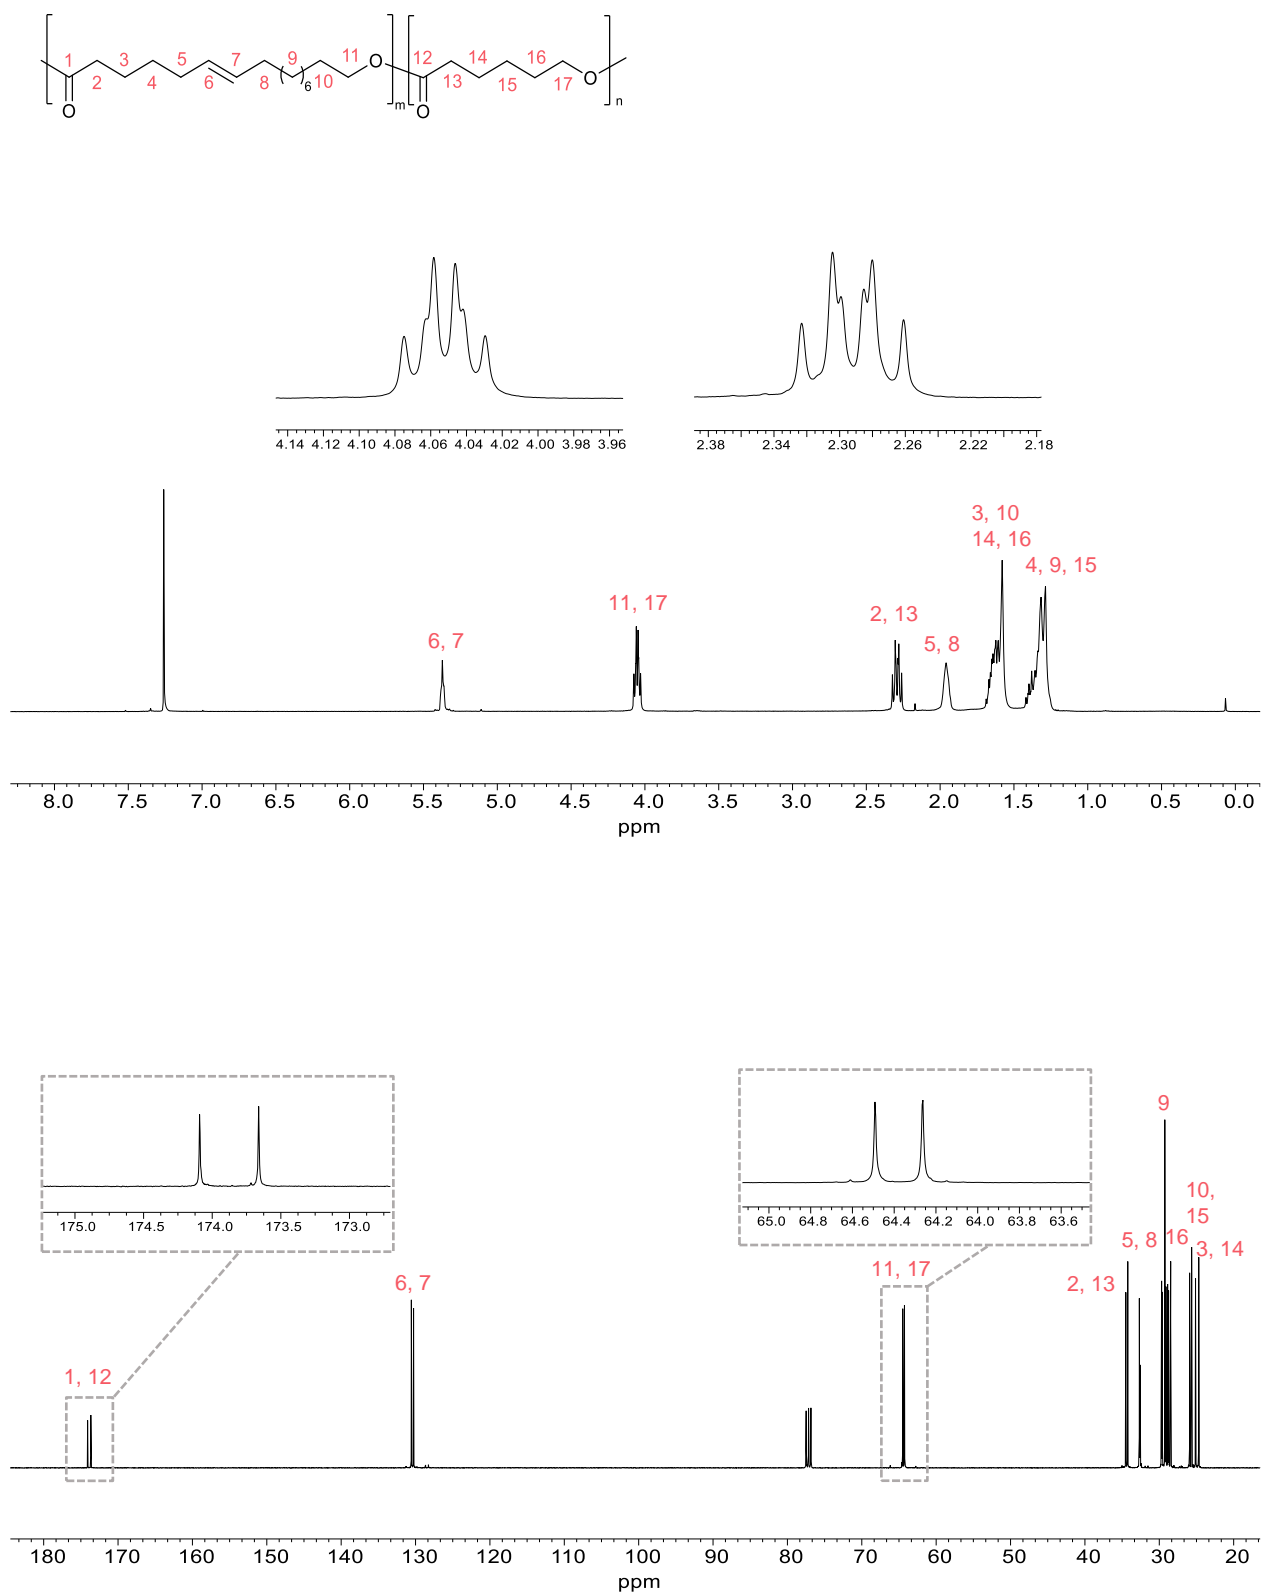

**Fig. S62**  $^1\text{H}$  and  $^{13}\text{C}\{^1\text{H}\}$  NMR spectra of poly(6HDL-*b*-CL) in  $\text{CDCl}_3$  at 298 K (Table 4, entry 8).

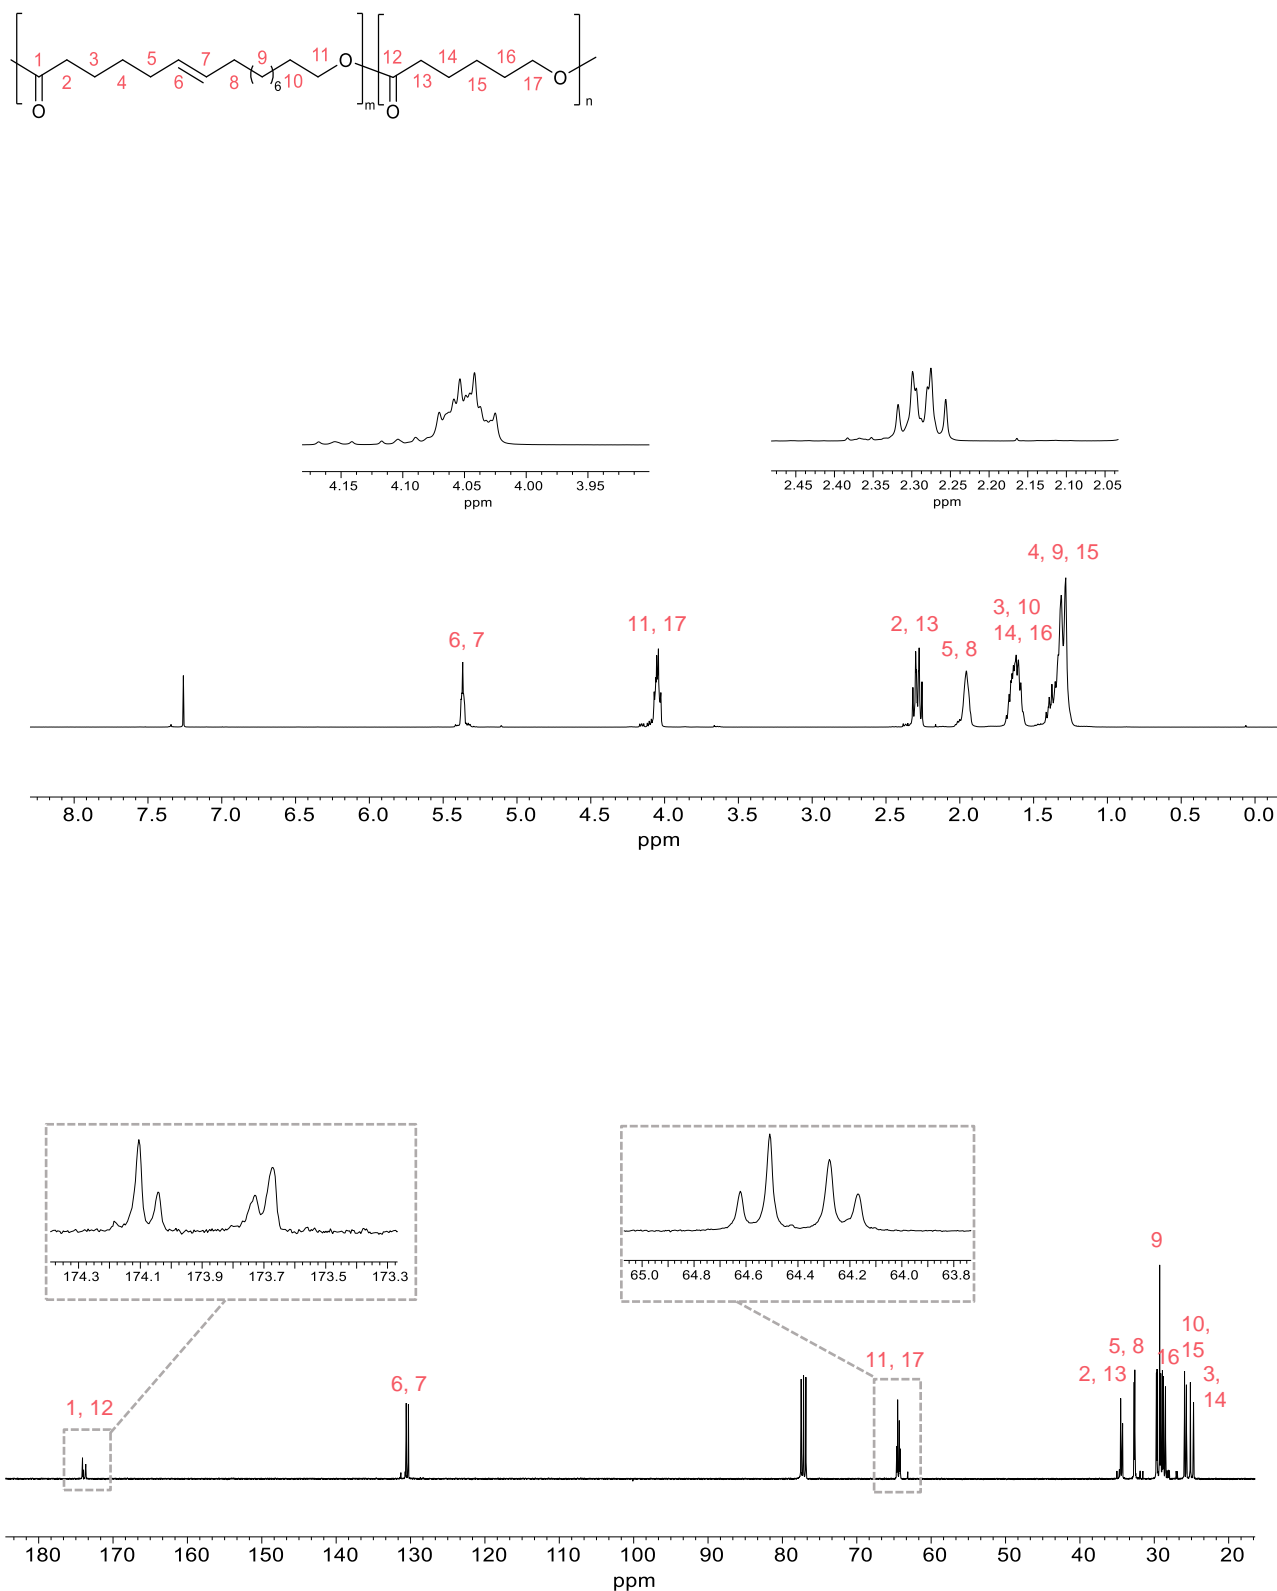

**Fig. S63**  $^1\text{H}$  and  $^{13}\text{C}\{^1\text{H}\}$  NMR spectra of poly(6HDL-co-CL) in  $\text{CDCl}_3$  at 298 K (Table 4, entry 9).



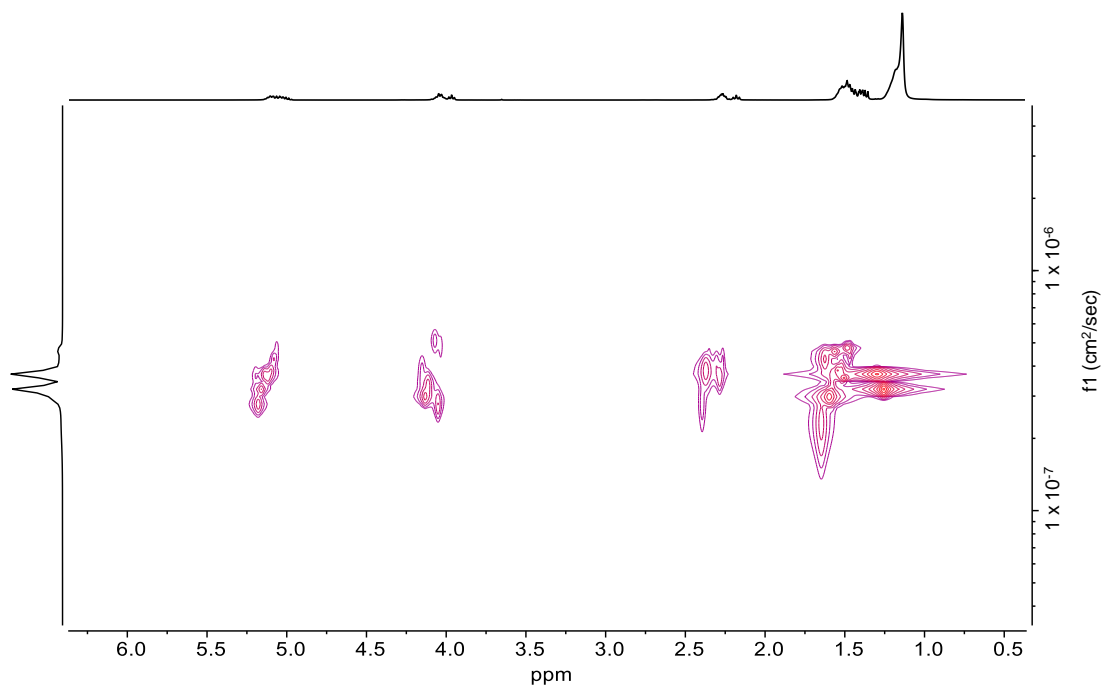

**Fig. S64** The DOSY NMR spectrum of a poly(PDL-*co*-L-LA) in CDCl<sub>3</sub> (Table 6, entry 2).

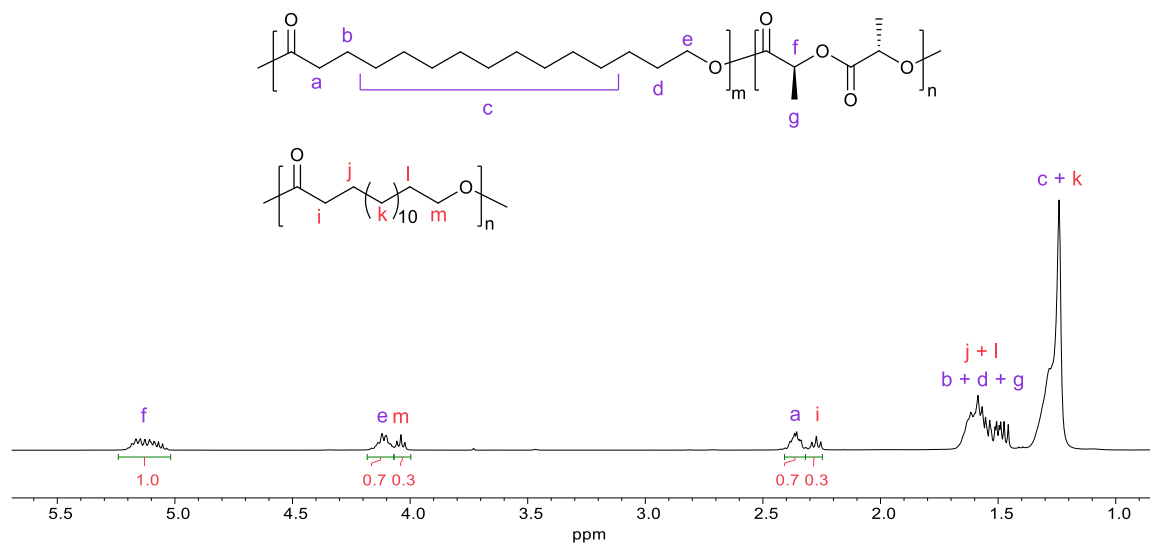

**Fig. S65** <sup>1</sup>H NMR spectrum of poly(L-LA-*co*-PDL) (Table 6, entry 3).

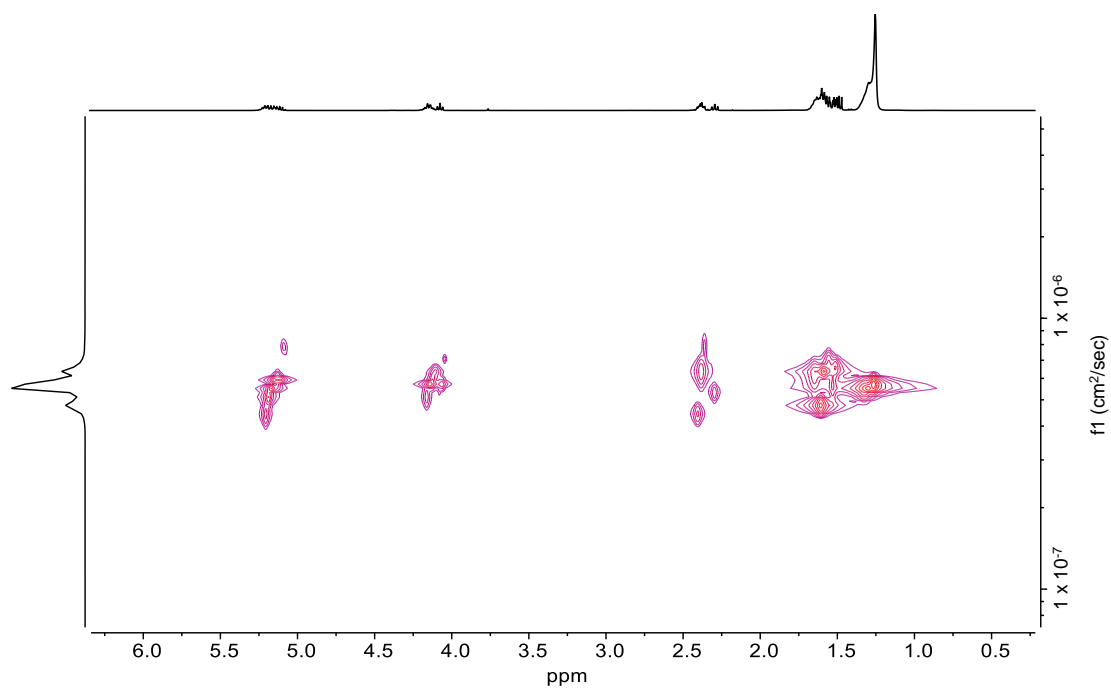

**Fig. S66** The DOSY NMR spectrum of a poly(L-LA-co-PDL) in  $\text{CDCl}_3$  (Table 6, entry 3).

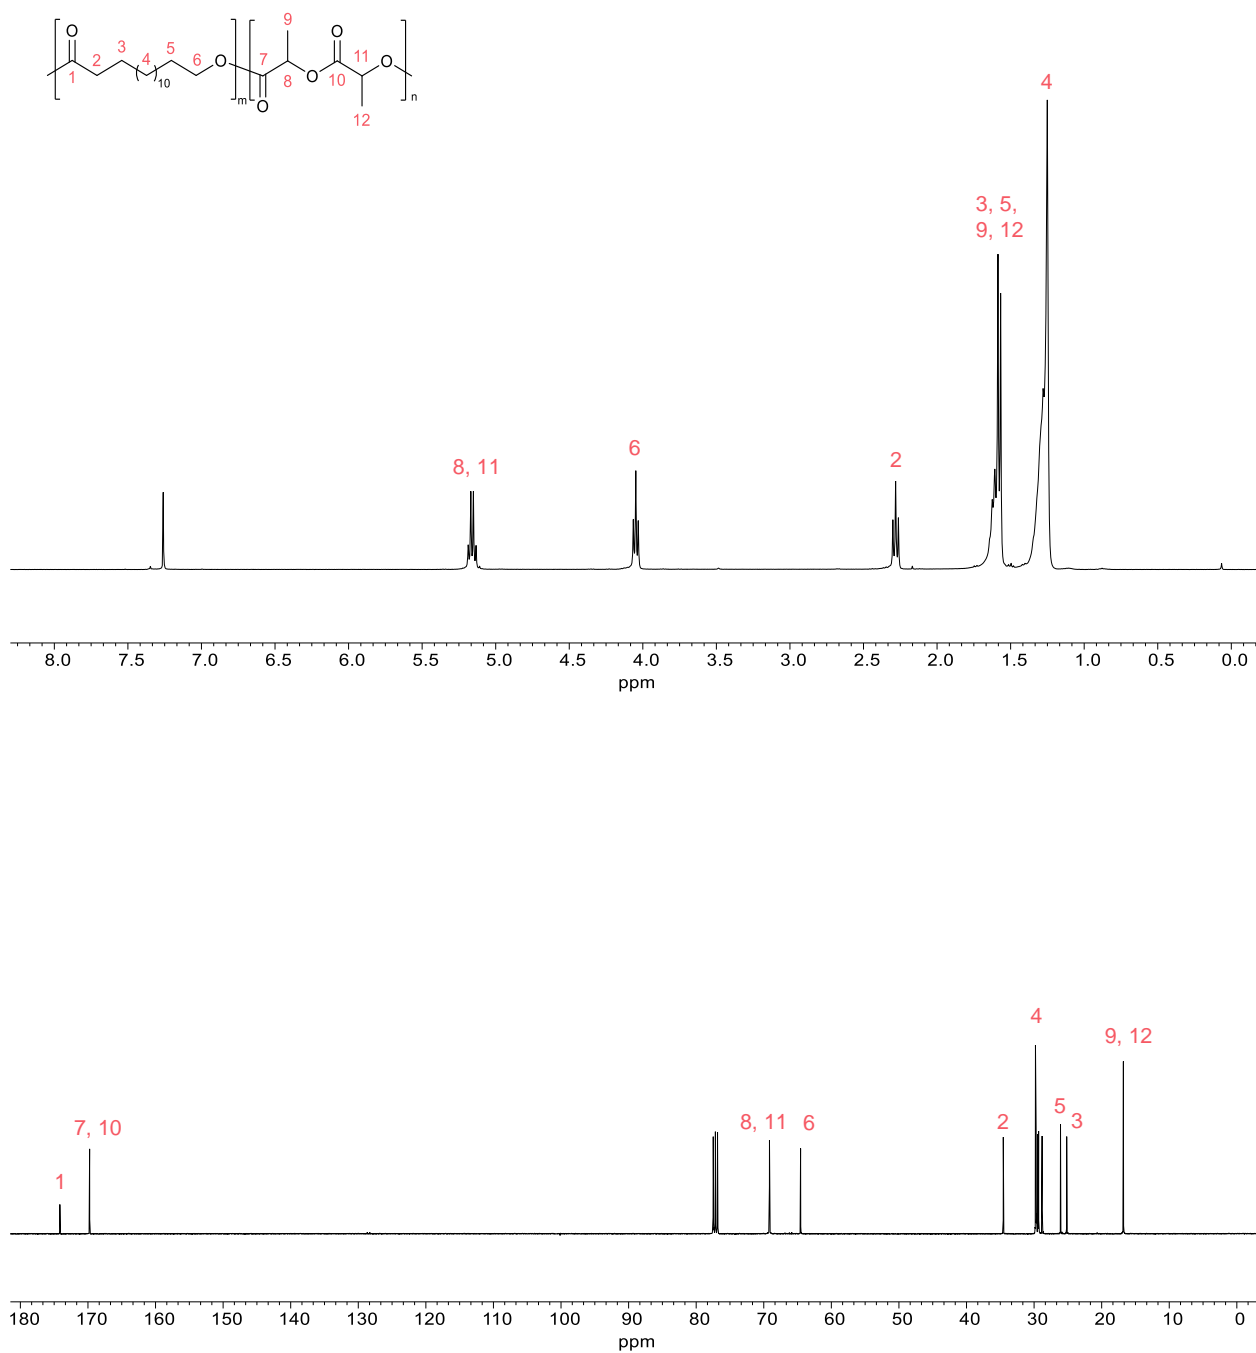

**Fig. S67**  $^1\text{H}$  and  $^{13}\text{C}\{^1\text{H}\}$  NMR spectra of poly(L-LA-*b*-PDL) in  $\text{CDCl}_3$  at 298 K (Table 6, entry 1).

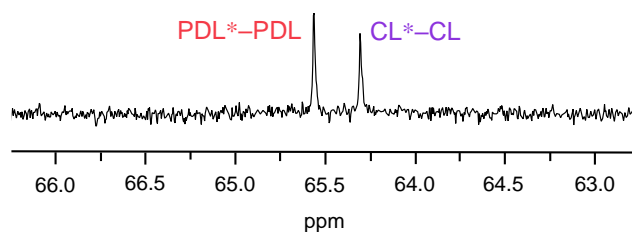

**Fig. S68**  $^{13}\text{C}\{^1\text{H}\}$  NMR spectra at the methylene region of poly(PDL-*b*-CL) in  $\text{CDCl}_3$  at 298 K (Table 7, entry 1).

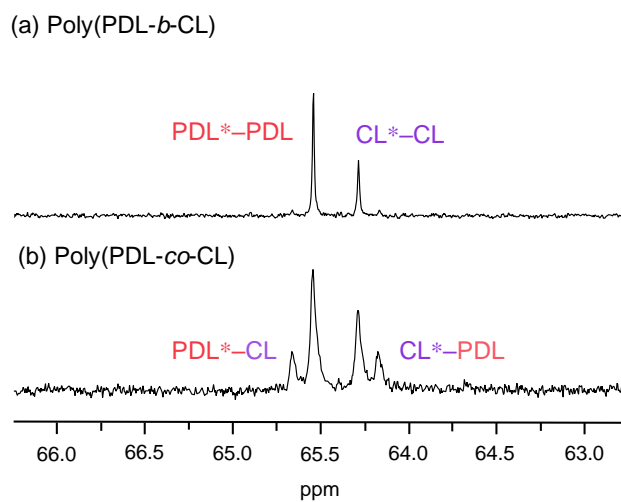

**Fig. S69**  $^{13}\text{C}\{^1\text{H}\}$  NMR spectra at the methylene region of poly(PDL-*b*-CL) (**a**, 30 + 5 min) and (**b**, 30 + 360 min) poly(PDL-*co*-CL) in  $\text{CDCl}_3$  at 298 K (Table 7, entry 2).

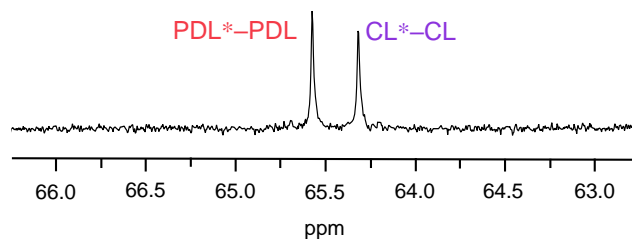

**Fig. S70**  $^{13}\text{C}\{^1\text{H}\}$  NMR spectra at the methylene region of poly(PDL-*b*-CL) in  $\text{CDCl}_3$  at 298 K (Table 7, entry 3).

## Ring-Opening Polymerization of L-LA using complexes 1–10

The polymerizations of high ring strain L-lactide (L-LA) were also carried out in order to compare the results with the polymerizations of MLs (Table S1). The values of the apparent rate constants ( $k_{\text{app}}$ ) collected in Table S1 show that the catalytic activity decreases in the order **5** > **7** > **4** > **6** > **9**  $\approx$  **10** > **8** > **2** > **1** > **3**. Complex **5**, featuring electron-withdrawing iodo atoms, was the most active catalyst examined in this study. Despite its acknowledged significance, complex **5** is the most active aluminum salen catalyst reported thus far. A smaller, although substantial, rate enhancement was also seen upon replacing a phenyl with a naphthalene ring (complex **4** vs. complex **7**). However, complex **6** with the electron withdrawing NO<sub>2</sub> groups ( $k_{\text{app}} = (176 \pm 7.77) \times 10^{-5} \text{ s}^{-1}$ ) displayed lower catalytic activity than the unsubstituted complex **4** ( $k_{\text{app}} = (226 \pm 6.59) \times 10^{-5} \text{ s}^{-1}$ ). The observed lower catalytic activity in complex **6** may be attributed to the stronger binding of the ring-opened alkoxide chain to the more Lewis acidic aluminum center that hinders the subsequent insertion step.<sup>1-4</sup> For the *bis*(pyrrolidene) aluminum complexes **9** and **10**, the similar  $k_{\text{app}}$  values were observed ( $k_{\text{app}} = (51.00 \pm 2.70) \times 10^{-5} \text{ s}^{-1}$  for **9**<sup>55</sup> and  $k_{\text{app}} = (52.29 \pm 2.64) \times 10^{-5} \text{ s}^{-1}$  for **10**), indicating that the steric effect was not evidenced in this group. It can be observed that the tetradentate aluminum complexes with the gem-dimethyl-substituted propylene backbone (**4–7** and **9–10**) exhibited higher catalytic performance than tetradentate aluminum complexes with ethylene linker (complexes **3** and **8**). The observed higher catalytic activity could be attributed to the greater flexibility of the 2,2-dimethylpropylene backbone imparted to the metal coordination sphere and hence better accommodation of the geometric requirements of the transition states for the ring-opening process.<sup>5</sup> In addition, changing the backbone from a C<sub>2</sub> alkylene linker to a C<sub>3</sub> unit results in a change in the conformation from *meridional* to *facial*.<sup>6</sup> The *facial* conformation is more reactive because there is more space for the monomer to coordinate *cis* to the growing polymer chain, which is required for the insertion step. Similar to the polymerization of MLs, the low coordinate bidentate aluminum complexes **1** and **2** displayed lower activity than the high coordinate tetradentate ones.<sup>7,8</sup>

**Table S1** Kinetic results for the ROP of MLs and L-LA using aluminum complexes **1–10** in the presence of benzyl alcohol.<sup>a</sup>

| Entry | Complex   | $k_{\text{app}}$ ( $10^{-5} \text{ s}^{-1}$ ) |
|-------|-----------|-----------------------------------------------|
| 1     | <b>1</b>  | $9.19 \pm 0.23$                               |
| 2     | <b>2</b>  | $16.96 \pm 0.76$                              |
| 3     | <b>3</b>  | $6.85 \pm 0.27$                               |
| 4     | <b>4</b>  | $226 \pm 6.59$                                |
| 5     | <b>5</b>  | $1288 \pm 55.46$                              |
| 6     | <b>6</b>  | $176 \pm 7.77$                                |
| 7     | <b>7</b>  | $463 \pm 20.07$                               |
| 8     | <b>8</b>  | $33.82 \pm 0.92$                              |
| 9     | <b>9</b>  | $51.00 \pm 2.70^9$                            |
| 10    | <b>10</b> | $52.29 \pm 2.64$                              |

<sup>a</sup>[L-LA]<sub>0</sub>: [Al]: [BnOH] = 50, [L-LA]<sub>0</sub> = 0.42 M, [Al] = 8.33 mM, toluene, 70 °C.

## References

- [1] K. Ding, M. O. Miranda, B. Moscata-Goodpaster, N. Ajellal, L. E. Breyfogle, E. D. Hermes, C. P. Schaller, S. E. Roe, C. J. Cramer, M. A. Hillmyer and W. B. Tolman, *Macromolecules*, 2012, **45**, 5387–5396.
- [2] S. Bian, S. Abbina, Z. Lu, E. Kolodka and G. Du, *Organometallics*, 2014, **33**, 2489–2495.
- [3] S. Kamavivhanurat, K. Jampakaew and P. Hormnirun, *Polym. Chem.* 2023, **14**, 1752–1772.
- [4] C. Nakonkhet, T. Nanok, P. Chuawong, W. Wattanathana and P. Hormnirun, *Dalton Trans.*, 2017, **46**, 11013–11030.
- [5] P. Hormnirun, E. L. Marshall, V. C. Gibson, R. I. Pugh and A. J. P. White, *Proc. Natl. Acad. Sci.*, 2006, **103**, 15343–15348.
- [6] M. P. F. Pepels, M. Bouyahyi, A. Heise, and R. Duchateau, *Macromolecules*, 2013, **46**, 4324–4334.
- [7] Y. Liu, W.-S. Dong, J.-Y. Liu and Y.-S. Li, *Dalton Trans.*, 2014, **43**, 2244–2251.
- [8] H.-C. Huang, B. Wang, Y.-P. Zhang and Y.-S. Li, *Polym. Chem.*, 2016, **7**, 5819–5827.
- [9] S. Tabthong, T. Nanok, P. Sumrit, P. Kongsaree, S. Prabpai, P. Chuawong and P. Hormnirun, *Macromolecules*, 2015, **48**, 6846–6861.
